# Supplementary material
Source: PubMed Central journal article supplement (PMC8595614)
Supplement: NIHMS1738736-supplement-supinfo.pdf [file NIHMS1738736-supplement-supinfo.pdf]

# Supporting Information for “Gene-gene interaction analysis incorporating network information via a structured Bayesian approach”

by Xing Qin, Shuangge Ma, Mengyun Wu

The Supporting Information contains the specification of the posterior distribution and mathematical details of the variational Bayesian expectation-maximization algorithm for the proposed method in Section S1, and additional simulation and data analysis results in Section S2.

## S1 The variational Bayesian expectation-maximization algorithm

In order to describe the entire computation process more clearly, we add the corresponding random variable to the symbolic representation of each distribution. For example, we re-express  $p(\mathbf{y}|\boldsymbol{\beta}) = \mathcal{N}(\tilde{\mathbf{X}}\boldsymbol{\beta}, \tau^{-1}\mathbf{I})$  as  $p(\mathbf{y}|\boldsymbol{\beta}) = \mathcal{N}(\mathbf{y}|\tilde{\mathbf{X}}\boldsymbol{\beta}, \tau^{-1}\mathbf{I})$ .

In the following, we denote  $\tilde{\mathbf{L}}_k = \mathbf{L}_k + \xi\mathbf{I} \triangleq \begin{pmatrix} \tilde{\mathbf{L}}_k^{(1)} & \mathbf{0}_{p_k \times \bar{p}_k} \\ \mathbf{0}_{\bar{p}_k \times p_k} & \tilde{\mathbf{L}}_k^{(2)} \end{pmatrix}$ , and  $\boldsymbol{\beta}_k^{(1)} = (\beta_j^{(1)})_{\{j \in V_k\}}$ ,  $\boldsymbol{\beta}_k^{(2)} = (\beta_{l_1 l_2}^{(2)})_{\{l_1, l_2 \in V_k, l_1 < l_2\}}$ , i.e.,  $\boldsymbol{\beta}_k^{(1)}$  and  $\boldsymbol{\beta}_k^{(2)}$  consist of the coefficients for the main effects and interactions in the  $k$ th network, respectively. Here  $\bar{p}_k = (p_k - 1)p_k/2$ .

### S1.1 Computation of the posterior distribution

We rewrite the following priors as the generative models with observation vector  $\mathbf{0}$ , i.e.,

$$\begin{aligned} p(\bar{\beta}_{l_1 l_2}^{(2)} | \gamma_{l_1}^{(1)} \gamma_{l_2}^{(1)}) &= \mathcal{N}(\bar{\beta}_{l_1 l_2}^{(2)} | 0, s_1)^{\gamma_{l_1}^{(1)} \gamma_{l_2}^{(1)}} \mathcal{N}(\bar{\beta}_{l_1 l_2}^{(2)} | 0, s_2)^{1 - \gamma_{l_1}^{(1)} \gamma_{l_2}^{(1)}} \\ &= \mathcal{N}(0 | \bar{\beta}_{l_1 l_2}^{(2)}, s_1)^{\gamma_{l_1}^{(1)} \gamma_{l_2}^{(1)}} \mathcal{N}(0 | \bar{\beta}_{l_1 l_2}^{(2)}, s_2)^{1 - \gamma_{l_1}^{(1)} \gamma_{l_2}^{(1)}} \\ &= p(0 | \bar{\beta}_{l_1 l_2}^{(2)}, \gamma_{l_1}^{(1)} \gamma_{l_2}^{(1)}), \\ p(\tilde{\boldsymbol{\beta}}_k | \alpha_k) &= \mathcal{N}(\tilde{\boldsymbol{\beta}}_k | \mathbf{0}, s_1 \tilde{\mathbf{L}}_k^{-1})^{\alpha_k} \mathcal{N}(\tilde{\boldsymbol{\beta}}_k | \mathbf{0}, s_2 \mathbf{I})^{1 - \alpha_k} \\ &= \mathcal{N}(\mathbf{0} | \tilde{\boldsymbol{\beta}}_k, s_1 \tilde{\mathbf{L}}_k^{-1})^{\alpha_k} \mathcal{N}(\mathbf{0} | \tilde{\boldsymbol{\beta}}_k, s_2 \mathbf{I})^{1 - \alpha_k} \\ &= p(\mathbf{0} | \tilde{\boldsymbol{\beta}}_k, \alpha_k). \end{aligned}$$

As shown above,  $p(\bar{\beta}_{l_1 l_2}^{(2)} | \gamma_{l_1}^{(1)} \gamma_{l_2}^{(1)})$  has the same form as  $p(0 | \bar{\beta}_{l_1 l_2}^{(2)}, \gamma_{l_1}^{(1)} \gamma_{l_2}^{(1)})$ , and  $p(\tilde{\boldsymbol{\beta}}_k | \alpha_k)$  has the same form as  $p(\mathbf{0} | \tilde{\boldsymbol{\beta}}_k, \alpha_k)$ , where we can view the observation vector  $\mathbf{0}$  as samples drawn from

$\bar{\beta}_{l_1 l_2}^{(2)}$  and  $\tilde{\beta}_k$ . Thus we obtain

$$\begin{aligned}
& p(\mathbf{y}, \boldsymbol{\beta}, \tilde{\boldsymbol{\beta}}, \bar{\boldsymbol{\beta}}, \boldsymbol{\gamma}, \boldsymbol{\alpha}, \boldsymbol{\zeta} | \mathbf{X}; \tau, \theta) \\
&= \mathcal{N}(\mathbf{y} | \tilde{\mathbf{X}} \boldsymbol{\beta}, \tau^{-1} \mathbf{I}) \prod_{j=1}^{p(p+1)/2} \mathcal{N}(\beta_j | 0, s_1)^{\gamma_j} \mathcal{N}(\beta_j | 0, s_2)^{1-\gamma_j} \text{Bern}(\gamma_j | \zeta_j) \text{Beta}(\zeta_j | a, b) \\
& \prod_{k=1}^K \left\{ p(\tilde{\boldsymbol{\beta}}_k | \boldsymbol{\beta}_k) \mathcal{N}(\mathbf{0} | \tilde{\boldsymbol{\beta}}_k, s_1 \tilde{\mathbf{L}}_k^{-1})^{\alpha_k} \mathcal{N}(\mathbf{0} | \tilde{\boldsymbol{\beta}}_k, s_2 \mathbf{I})^{1-\alpha_k} \text{Bern}(\alpha_k | \theta) \right\} \prod_{l_1=1}^p \prod_{l_2 > l_1}^p \left[ p(\bar{\beta}_{l_1 l_2}^{(2)} | \beta_{l_1 l_2}^{(2)}) \right. \\
& \left. p(0 | \bar{\beta}_{l_1 l_2}^{(2)}, \gamma_{l_1}^{(1)}, \gamma_{l_2}^{(1)}) \right].
\end{aligned}$$

With the assumption of the same prior distribution for  $\boldsymbol{\beta}$ ,  $\bar{\boldsymbol{\beta}}$ , and  $\tilde{\boldsymbol{\beta}}$ , i.e.,  $p(\tilde{\boldsymbol{\beta}}_k | \boldsymbol{\beta}_k) = \mathbf{1}_{\{\tilde{\boldsymbol{\beta}}_k = \boldsymbol{\beta}_k\}}$  and  $p(\bar{\beta}_{l_1 l_2}^{(2)} | \beta_{l_1 l_2}^{(2)}) = \mathbf{1}_{\{\bar{\beta}_{l_1 l_2}^{(2)} = \beta_{l_1 l_2}^{(2)}\}}$ , we can replace  $\bar{\beta}_{l_1 l_2}^{(2)}$  (or  $\tilde{\boldsymbol{\beta}}_k$ ) with  $\beta_{l_1 l_2}^{(2)}$  (or  $\boldsymbol{\beta}_k$ ). So the parameters' posterior distribution can be written as

$$\begin{aligned}
& p(\boldsymbol{\beta}, \boldsymbol{\gamma}, \boldsymbol{\alpha}, \boldsymbol{\zeta} | \mathbf{y}, \mathbf{X}; \tau, \theta) \\
&= \frac{1}{C} \mathcal{N}(\mathbf{y} | \tilde{\mathbf{X}} \boldsymbol{\beta}, \tau^{-1} \mathbf{I}) \prod_{j=1}^{p(p+1)/2} \mathcal{N}(\beta_j | 0, s_1)^{\gamma_j} \mathcal{N}(\beta_j | 0, s_2)^{1-\gamma_j} \text{Bern}(\gamma_j | \zeta_j) \text{Beta}(\zeta_j | a, b) \\
& \prod_{k=1}^K \left\{ \mathcal{N}(\boldsymbol{\beta}_k | \mathbf{0}, s_1 \tilde{\mathbf{L}}_k^{-1})^{\alpha_k} \mathcal{N}(\boldsymbol{\beta}_k | \mathbf{0}, s_2 \mathbf{I})^{1-\alpha_k} \text{Bern}(\alpha_k | \theta) \right\} \\
& \prod_{l_1=1}^p \prod_{l_2 > l_1}^p \mathcal{N}(\beta_{l_1 l_2} | 0, s_1)^{\gamma_{l_1} \gamma_{l_2}} \mathcal{N}(\beta_{l_1 l_2} | 0, s_2)^{1-\gamma_{l_1} \gamma_{l_2}},
\end{aligned}$$

where  $C$  is the normalization constant.

## S1.2 Graphical representation of the proposed hybrid Bayesian approach

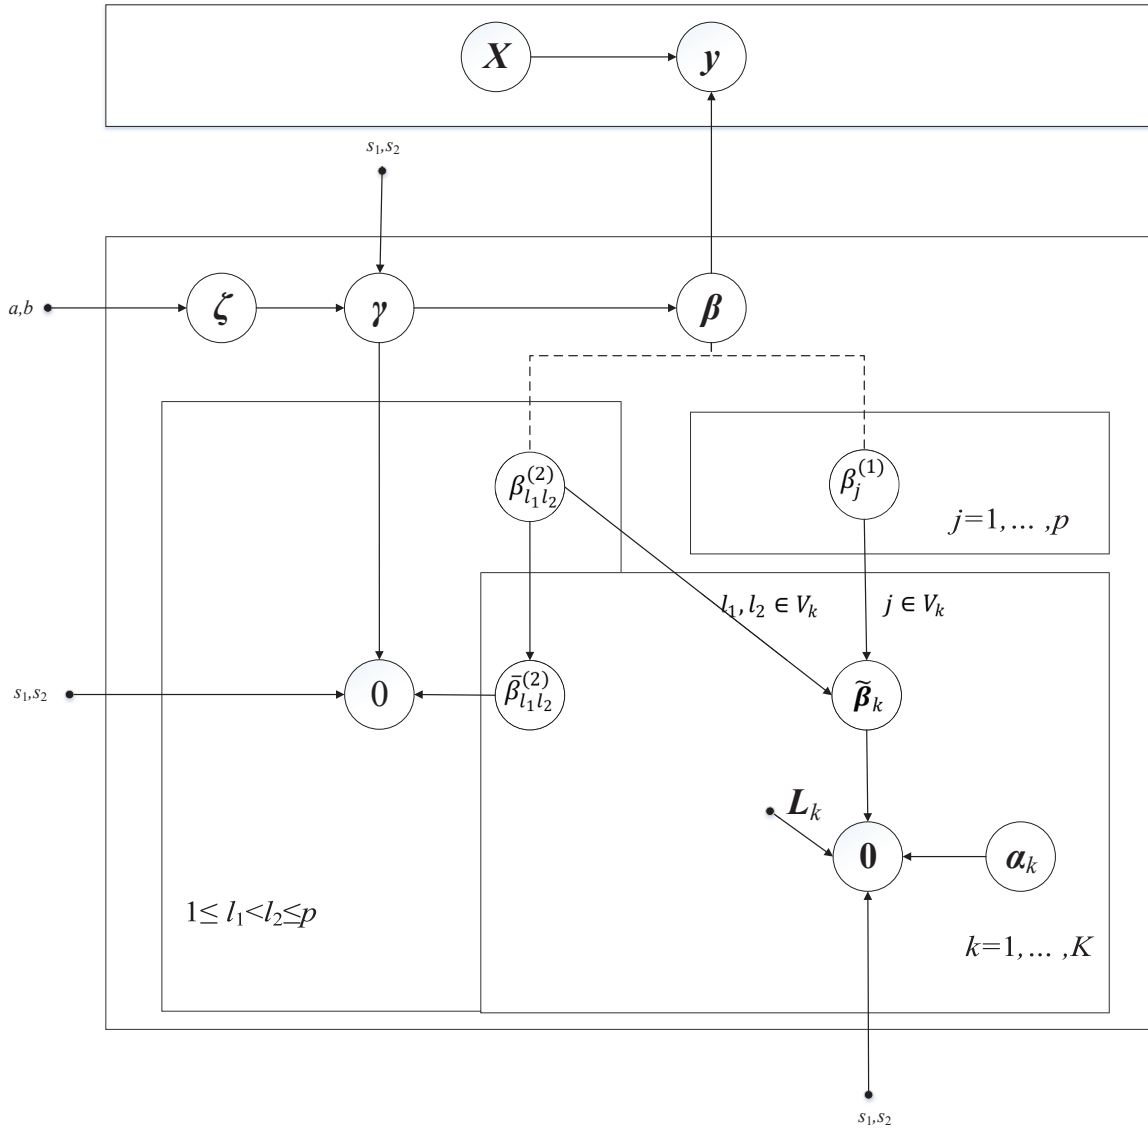

Figure S1: Graphical representation of the proposed hybrid Bayesian approach.

### S1.3 Derivation of the optimal variational distribution

As stated in the main text, we denote  $q(\Omega)$  as a candidate approximating distribution of the true posterior distribution. For simplicity, denote  $\mathbb{E}(\cdot)$  as the expectation taken with respect to  $q(\Omega)$ , and the logarithm of the marginal likelihood can be decomposed as

$$\log p(\mathbf{y}|\mathbf{X}; \tau, \theta) = \mathcal{L}_q + \text{KL}(q(\Omega)||p(\Omega|\mathbf{y}, \mathbf{X}; \tau, \theta)),$$

where

$$\begin{aligned} \mathcal{L}_q &= \mathbb{E} \log \left[ \frac{p(\mathbf{y}, \Omega|\mathbf{X}; \tau, \theta)}{q(\Omega)} \right], \\ \text{KL}(q(\Omega)||p(\Omega|\mathbf{y}, \mathbf{X}; \tau, \theta)) &= \mathbb{E} \log \left[ \frac{q(\Omega)}{p(\Omega|\mathbf{y}, \mathbf{X}; \tau, \theta)} \right] = \int q(\Omega) \log \left[ \frac{q(\Omega)}{p(\Omega|\mathbf{y}, \mathbf{X}; \tau, \theta)} \right] d\Omega. \end{aligned}$$

Minimizing the KL divergence with respect to the approximating distribution  $q(\Omega)$  is equivalent to maximizing the evidence lower bound  $\mathcal{L}_q$ . In the expectation ( $\mathbb{E}$ ) step, we optimize the KL divergence ( $\mathcal{L}_q$ ) with respect to the variational parameters  $\Omega$  while holding the model parameters  $\tau$  and  $\theta$  fixed. In the maximization ( $\mathbb{M}$ ) step, we optimize the KL divergence with respect to the model parameters while keeping the variational parameters fixed.

#### S1.3.1 E-step

Notice that the logarithm of the joint probability function for  $\Omega, \mathbf{y}$  can be written as

$$\begin{aligned} &\log p(\mathbf{y}, \Omega|\mathbf{X}; \tau, \theta) \\ &= \log \left\{ \mathcal{N}(\mathbf{y}|\tilde{\mathbf{X}}\boldsymbol{\beta}, \tau^{-1}\mathbf{I}) \prod_{j=1}^{p(p+1)/2} \mathcal{N}(\beta_j|0, s_1)^{\gamma_j} \mathcal{N}(\beta_j|0, s_2)^{1-\gamma_j} \text{Bern}(\gamma_j|\zeta_j) \text{Beta}(\zeta_j|a, b) \right. \\ &\quad \left. \prod_{k=1}^K \left\{ \mathcal{N}(\boldsymbol{\beta}_k|\mathbf{0}, s_1 \tilde{\mathbf{L}}_k^{-1})^{\alpha_k} \mathcal{N}(\boldsymbol{\beta}_k|\mathbf{0}, s_2 \mathbf{I})^{1-\alpha_k} \text{Bern}(\alpha_k|\theta) \right\} \right. \\ &\quad \left. \prod_{l_1=1}^p \prod_{l_2>l_1}^p \mathcal{N}(\beta_{l_1 l_2}|0, s_1)^{\gamma_{l_1} \gamma_{l_2}} \mathcal{N}(\beta_{l_1 l_2}|0, s_2)^{1-\gamma_{l_1} \gamma_{l_2}} \right\}. \end{aligned}$$

We consider the variational distribution with the form

$$q(\Omega) = q(\boldsymbol{\beta}) q(\boldsymbol{\gamma}) q(\boldsymbol{\alpha}) q(\boldsymbol{\zeta}).$$

According to the general formula of the variational method, the optimal solution of  $q(\Omega)$  is computed as follows.

1. For  $q(\boldsymbol{\beta})$ , to avoid high-dimensional covariance matrix operations, we assume  $q(\boldsymbol{\beta}) = \prod_{j=1}^p q(\beta_j^{(1)}) \prod_{l_1=1}^p \prod_{l_2>l_1}^p q(\beta_{l_1 l_2}^{(2)})$ , where  $q(\cdot)$  denotes the variational distribution of the corresponding parameter.

(a) For  $q\left(\beta_j^{(1)}\right)$ , for simplicity, assume  $j \in V_{k_j}$ , i.e., the  $j$ th main effect belongs to the  $k_j$ th network. We have

$$\begin{aligned}
\log q\left(\beta_j^{(1)}\right) &= \mathbb{E}_{(-\beta_j^{(1)})} [\log p(\mathbf{y}, \Omega | \mathbf{X}; \tau, \theta)] + \text{const} \\
&= \mathbb{E}_{(-\beta_j^{(1)})} \left\{ \log \mathcal{N}(\mathbf{y} | \tilde{\mathbf{X}}\boldsymbol{\beta}, \tau^{-1}\mathbf{I}) + \log p\left(\beta_j^{(1)} | \gamma_j^{(1)}\right) + \log p\left(\boldsymbol{\beta}_{k_j} | \alpha_{k_j}\right) \right\} + \text{const} \\
&= \mathbb{E}_{(-\beta_j^{(1)})} \left\{ -\frac{\tau}{2} (\mathbf{y} - \tilde{\mathbf{X}}\boldsymbol{\beta})^\top (\mathbf{y} - \tilde{\mathbf{X}}\boldsymbol{\beta}) - \frac{\left(\beta_j^{(1)}\right)^2}{2s_1} \gamma_j^{(1)} - \frac{\left(\beta_j^{(1)}\right)^2}{2s_2} (1 - \gamma_j^{(1)}) \right. \\
&\quad \left. - \left(\boldsymbol{\beta}_{k_j}^{(1)}\right)^\top \left( \frac{\alpha_{k_j}}{2s_1} \tilde{\mathbf{L}}_{k_j}^{(1)} + \frac{1 - \alpha_{k_j}}{2s_2} \mathbf{I} \right) \boldsymbol{\beta}_{k_j}^{(1)} \right\} + \text{const} \tag{S1} \\
&= -\frac{\tau}{2} \sum_i \left( \langle \text{res}_i^{(-j)} \rangle - x_{ij} \beta_j^{(1)} \right)^2 - \frac{\left(\beta_j^{(1)}\right)^2}{2} \left[ \frac{\langle \gamma_j^{(1)} \rangle}{s_1} + \frac{1 - \langle \gamma_j^{(1)} \rangle}{s_2} \right] \\
&\quad - \mathbb{E}_{(-\beta_j^{(1)})} \left[ \left(\boldsymbol{\beta}_{k_j}^{(1)}\right)^\top \left( \frac{\alpha_{k_j}}{2s_1} \tilde{\mathbf{L}}_{k_j}^{(1)} + \frac{1 - \alpha_{k_j}}{2s_2} \mathbf{I} \right) \boldsymbol{\beta}_{k_j}^{(1)} \right] + \text{const},
\end{aligned}$$

where  $\mathbb{E}_{(-\beta_j^{(1)})}(\cdot)$  denotes the expectation taken with respect to the approximate posterior distribution over  $\Omega$  except  $\beta_j^{(1)}$ ,  $\langle \cdot \rangle$  denotes the expectation over the corresponding variational distribution,  $\tilde{\mathbf{x}}_i$  is the  $i$ th row of  $\tilde{\mathbf{X}}$ , and  $\text{res}_i^{(-j)} = y_i - \tilde{\mathbf{x}}_i \boldsymbol{\beta} + x_{ij} \beta_j^{(1)}$ . For convenience, we rewrite

$$\mathbf{B}_{k_j}^{(1)} =: \frac{\alpha_{k_j}}{s_1} \tilde{\mathbf{L}}_{k_j}^{(1)} + \frac{1 - \alpha_{k_j}}{s_2} \mathbf{I} \triangleq \begin{pmatrix} \mathbf{b}_{lj}^{(k_j)} \end{pmatrix}_{p_{k_j} \times p_{k_j}}.$$

Note that  $\underline{\mathbf{B}}_{k_j}^{(1)}$  is a symmetric matrix, and the right side of (S1) can be written as

$$\begin{aligned}
\log q\left(\beta_j^{(1)}\right) &= -\frac{\tau}{2} \sum_i \left( \langle \text{res}_i^{(-j)} \rangle - x_{ij} \beta_j^{(1)} \right)^2 - \frac{1}{2} \mathbb{E}_{(-\beta_j^{(1)})} \left( \left( \beta_{k_j}^{(1)} \right)^T \underline{\mathbf{B}}_{k_j}^{(1)} \beta_{k_j}^{(1)} \right) \\
&\quad - \frac{\left( \beta_j^{(1)} \right)^2}{2} \left[ \frac{\langle \gamma_j^{(1)} \rangle}{s_1} + \frac{1 - \langle \gamma_j^{(1)} \rangle}{s_2} \right] + \text{const} \\
&= -\frac{\tau}{2} \sum_i \left( \langle \text{res}_i^{(-j)} \rangle - x_{ij} \beta_j^{(1)} \right)^2 - \frac{1}{2} \langle \underline{b}_{jj}^{(k_j)} \rangle \left( \beta_j^{(1)} \right)^2 - \beta_j^{(1)} \sum_{l \neq j, k_l = k_j} \langle \underline{b}_{lj}^{(k_j)} \rangle \langle \beta_l^{(1)} \rangle \\
&\quad - \frac{\left( \beta_j^{(1)} \right)^2}{2} \left[ \frac{\langle \gamma_j^{(1)} \rangle}{s_1} + \frac{1 - \langle \gamma_j^{(1)} \rangle}{s_2} \right] + \text{const} \\
&= \tau \sum_i \left[ \langle \text{res}_i^{(-j)} \rangle x_{ij} \beta_j^{(1)} - \frac{\left( x_{ij} \beta_j^{(1)} \right)^2}{2} \right] - \frac{1}{2} \langle \underline{b}_{jj}^{(k_j)} \rangle \left( \beta_j^{(1)} \right)^2 - \beta_j^{(1)} \sum_{l \neq j, k_l = k_j} \langle \underline{b}_{lj}^{(k_j)} \rangle \langle \beta_l^{(1)} \rangle \\
&\quad - \frac{\left( \beta_j^{(1)} \right)^2}{2} \left[ \frac{\langle \gamma_j^{(1)} \rangle}{s_1} + \frac{1 - \langle \gamma_j^{(1)} \rangle}{s_2} \right] + \text{const} \\
&= -\frac{\frac{\langle \gamma_j^{(1)} \rangle}{s_1} + \frac{1 - \langle \gamma_j^{(1)} \rangle}{s_2} + \langle \underline{b}_{jj}^{(k_j)} \rangle + \tau \sum_i (x_{ij})^2}{2} \left( \beta_j^{(1)} \right)^2 + \beta_j^{(1)} \left[ \tau \sum_i \langle \text{res}_i^{(-j)} \rangle x_{ij} \right. \\
&\quad \left. - \sum_{l \neq j, k_l = k_j} \langle \underline{b}_{lj}^{(k_j)} \rangle \langle \beta_l^{(1)} \rangle \right] + \text{const}.
\end{aligned}$$

Thus, we have  $q\left(\beta_j^{(1)}\right) = \mathcal{N}\left(\beta_j^{(1)} | m_j^{(1)}, \left(\sigma_j^{(1)}\right)^2\right)$  with the parameters

$$\begin{cases} \left(\sigma_j^{(1)}\right)^2 = \left( \frac{\langle \gamma_j^{(1)} \rangle}{s_1} + \frac{1 - \langle \gamma_j^{(1)} \rangle}{s_2} + \langle \underline{b}_{jj}^{(k_j)} \rangle + \tau \sum_i (x_{ij})^2 \right)^{-1}, \\ m_j^{(1)} = \left(\sigma_j^{(1)}\right)^2 \left( \tau \sum_i x_{ij} \langle \text{res}_i^{(-j)} \rangle - \sum_{l \neq j, k_l = k_j} \langle \underline{b}_{lj}^{(k_j)} \rangle \langle \beta_l^{(1)} \rangle \right). \end{cases}$$

(b) For  $q \left( \beta_{l_1 l_2}^{(2)} \right)$ ,  $k_{l_1} = k_{l_2} \triangleq k$ , i.e., for coefficients of the interactions within the networks, we have

$$\begin{aligned}
\log q \left( \beta_{l_1 l_2}^{(2)} \right) &= \mathbb{E}_{(-\beta_{l_1 l_2}^{(2)})} [\log p(\mathbf{y}, \Omega | \mathbf{X}; \tau, \theta)] + \text{const} \\
&= \mathbb{E}_{(-\beta_{l_1 l_2}^{(2)})} \left\{ \log \mathcal{N}(\mathbf{y} | \tilde{\mathbf{X}} \boldsymbol{\beta}, \tau^{-1} \mathbf{I}) + \log p \left( \beta_{l_1 l_2}^{(2)} | \gamma_{l_1 l_2}^{(2)} \right) + \log p(\boldsymbol{\beta}_k | \alpha_k) \right. \\
&\quad \left. + \log p \left( \beta_{l_1 l_2}^{(2)} | \gamma_{l_1}^{(1)} \gamma_{l_2}^{(1)} \right) \right\} + \text{const} \\
&= \mathbb{E}_{(-\beta_{l_1 l_2}^{(2)})} \left\{ -\frac{\tau}{2} (\mathbf{y} - \tilde{\mathbf{X}} \boldsymbol{\beta})^\top (\mathbf{y} - \tilde{\mathbf{X}} \boldsymbol{\beta}) - \frac{\left( \beta_{l_1 l_2}^{(2)} \right)^2}{2s_1} \gamma_{l_1 l_2}^{(2)} \right. \\
&\quad - \frac{\left( \beta_{l_1 l_2}^{(2)} \right)^2}{2s_2} \left( 1 - \gamma_{l_1 l_2}^{(2)} \right) - \frac{\left( \beta_{l_1 l_2}^{(2)} \right)^2}{2s_1} \gamma_{l_1}^{(1)} \gamma_{l_2}^{(1)} - \frac{\left( \beta_{l_1 l_2}^{(2)} \right)^2}{2s_2} \left( 1 - \gamma_{l_1}^{(1)} \gamma_{l_2}^{(1)} \right) \\
&\quad \left. - \left( \boldsymbol{\beta}_k^{(2)} \right)^\top \left( \frac{\alpha_k}{2s_1} \tilde{\mathbf{L}}_k^{(2)} + \frac{1 - \alpha_k}{2s_2} \mathbf{I} \right) \boldsymbol{\beta}_k^{(2)} \right\} + \text{const} \\
&= -\frac{\tau}{2} \sum_i \left( \left\langle \text{res}_i^{(-l_1 l_2)} \right\rangle - x_{il_1} x_{il_2} \beta_{l_1 l_2}^{(2)} \right)^2 - \frac{\left( \beta_{l_1 l_2}^{(2)} \right)^2}{2} \left[ \frac{\left\langle \gamma_{l_1 l_2}^{(2)} \right\rangle}{s_1} \right. \\
&\quad \left. + \frac{1 - \left\langle \gamma_{l_1 l_2}^{(2)} \right\rangle}{s_2} + \frac{\left\langle \gamma_{l_1}^{(1)} \gamma_{l_2}^{(1)} \right\rangle}{s_1} + \frac{1 - \left\langle \gamma_{l_1}^{(1)} \gamma_{l_2}^{(1)} \right\rangle}{s_2} \right] \\
&\quad - \mathbb{E}_{(-\beta_{l_1 l_2}^{(2)})} \left[ \left( \boldsymbol{\beta}_k^{(2)} \right)^\top \left( \frac{\alpha_k}{2s_1} \tilde{\mathbf{L}}_k^{(2)} + \frac{1 - \alpha_k}{2s_2} \mathbf{I} \right) \boldsymbol{\beta}_k^{(2)} \right] + \text{const},
\end{aligned} \tag{S2}$$

where  $\text{res}_i^{(-l_1 l_2)} = y_i - \tilde{\mathbf{x}}_i \boldsymbol{\beta} + x_{il_1} x_{il_2} \beta_{l_1 l_2}^{(2)}$ . Rewrite

$$\mathbf{B}_k^{(2)} =: \frac{\alpha_k}{s_1} \tilde{\mathbf{L}}_k^{(2)} + \frac{1 - \alpha_k}{s_2} \mathbf{I} \triangleq \left( \hat{b}_{l_1 \sim j_1, l_2 \sim j_2}^{(k)} \right)_{\bar{p}_k \times \bar{p}_k},$$

where  $\hat{b}_{l_1 \sim j_1, l_2 \sim j_2}^{(k)}$  denotes the corresponding element for the interactions indexed by  $l_1 j_1$  and  $l_2 j_2$ .

The right side of (S2) can be written as

$$\begin{aligned}
& -\frac{\tau}{2} \sum_i \left( \langle \text{res}_i^{(-l_1 l_2)} \rangle - x_{il_1} x_{il_2} \beta_{l_1 l_2}^{(2)} \right)^2 - \frac{1}{2} \mathbb{E}_{(-\beta_{l_1 l_2}^{(2)})} \left( \left( \beta_k^{(2)} \right)^T \mathbf{B}_k^{(2)} \beta_k^{(2)} \right) \\
& - \frac{\left( \beta_{l_1 l_2}^{(2)} \right)^2}{2} \left[ \frac{\langle \gamma_{l_1 l_2}^{(2)} \rangle}{s_1} + \frac{1 - \langle \gamma_{l_1 l_2}^{(2)} \rangle}{s_2} + \frac{\langle \gamma_{l_1}^{(1)} \gamma_{l_2}^{(1)} \rangle}{s_1} + \frac{1 - \langle \gamma_{l_1}^{(1)} \gamma_{l_2}^{(1)} \rangle}{s_2} \right] + \text{const} \\
& = -\frac{\tau}{2} \sum_i \left( \langle \text{res}_i^{(-l_1 l_2)} \rangle - x_{il_1} x_{il_2} \beta_{l_1 l_2}^{(2)} \right)^2 - \beta_{l_1 l_2}^{(2)} \sum_{\substack{(j', l') \neq (l_1, l_2) \\ k_{j'} = k_{l'} = k}} \langle \hat{b}_{j' \sim l', l_1 \sim l_2}^{(k)} \rangle \langle \beta_{j' l'}^{(2)} \rangle \\
& - \frac{1}{2} \langle \hat{b}_{l_1 \sim l_2, l_1 \sim l_2}^{(k)} \rangle \left( \beta_{l_1 l_2}^{(2)} \right)^2 - \frac{\left( \beta_{l_1 l_2}^{(2)} \right)^2}{2} \left[ \frac{2 - \langle \gamma_{l_1 l_2}^{(2)} \rangle - \langle \gamma_{l_1}^{(1)} \gamma_{l_2}^{(1)} \rangle}{s_2} + \frac{\langle \gamma_{l_1}^{(1)} \gamma_{l_2}^{(1)} \rangle + \langle \gamma_{l_1 l_2}^{(2)} \rangle}{s_1} \right] \\
& + \text{const} \\
& = \tau \sum_i \left[ \langle \text{res}_i^{(-l_1 l_2)} \rangle x_{il_1} x_{il_2} \beta_{l_1 l_2}^{(2)} - \frac{\left( x_{il_1} x_{il_2} \beta_{l_1 l_2}^{(2)} \right)^2}{2} \right] - \beta_{l_1 l_2}^{(2)} \sum_{\substack{(j', l') \neq (l_1, l_2) \\ k_{j'} = k_{l'} = k}} \langle \hat{b}_{j' \sim l', l_1 \sim l_2}^{(k)} \rangle \langle \beta_{j' l'}^{(2)} \rangle \\
& - \frac{1}{2} \langle \hat{b}_{l_1 \sim l_2, l_1 \sim l_2}^{(k)} \rangle \left( \beta_{l_1 l_2}^{(2)} \right)^2 - \frac{\left( \beta_{l_1 l_2}^{(2)} \right)^2}{2} \left[ \frac{2 - \langle \gamma_{l_1 l_2}^{(2)} \rangle - \langle \gamma_{l_1}^{(1)} \gamma_{l_2}^{(1)} \rangle}{s_2} + \frac{\langle \gamma_{l_1}^{(1)} \gamma_{l_2}^{(1)} \rangle + \langle \gamma_{l_1 l_2}^{(2)} \rangle}{s_1} \right] \\
& + \text{const} \\
& = -\frac{\left( \beta_{l_1 l_2}^{(2)} \right)^2}{2} \left[ \left( 2 - \langle \gamma_{l_1 l_2}^{(2)} \rangle - \langle \gamma_{l_1}^{(1)} \gamma_{l_2}^{(1)} \rangle \right) s_2^{-1} + \left( \langle \gamma_{l_1}^{(1)} \gamma_{l_2}^{(1)} \rangle + \langle \gamma_{l_1 l_2}^{(2)} \rangle \right) s_1^{-1} + \langle \hat{b}_{l_1 \sim l_2, l_1 \sim l_2}^{(k)} \rangle \right. \\
& \left. + \tau \sum_i \left( x_{il_1} x_{il_2} \right)^2 \right] + \beta_{l_1 l_2}^{(2)} \left[ \tau \sum_i \langle \text{res}_i^{(-l_1 l_2)} \rangle x_{il_1} x_{il_2} - \sum_{\substack{(j', l') \neq (l_1, l_2) \\ k_{j'} = k_{l'} = k}} \langle \hat{b}_{j' \sim l', l_1 \sim l_2}^{(k)} \rangle \langle \beta_{j' l'}^{(2)} \rangle \right] \\
& + \text{const}.
\end{aligned}$$

Thus, for  $k_{l_1} = k_{l_2} = k$ , we have  $q \left( \beta_{l_1 l_2}^{(2)} \right) = \mathcal{N} \left( \beta_{l_1 l_2}^{(2)} | m_{l_1 l_2}^{(2)}, \left( \sigma_{l_1 l_2}^{(2)} \right)^2 \right)$  with the parameters

$$\begin{cases} \left( \sigma_{l_1 l_2}^{(2)} \right)^2 = \left( \frac{2 - \langle \gamma_{l_1 l_2}^{(2)} \rangle - \langle \gamma_{l_1}^{(1)} \gamma_{l_2}^{(1)} \rangle}{s_2} + \frac{\langle \gamma_{l_1}^{(1)} \gamma_{l_2}^{(1)} \rangle + \langle \gamma_{l_1 l_2}^{(2)} \rangle}{s_1} + \langle \hat{b}_{l_1 \sim l_2, l_1 \sim l_2}^{(k)} \rangle + \tau \sum_i \left( x_{il_1} x_{il_2} \right)^2 \right)^{-1}, \\ m_{l_1 l_2}^{(2)} = \left( \sigma_{l_1 l_2}^{(2)} \right)^2 \left( \tau \sum_i x_{il_1} x_{il_2} \langle \text{res}_i^{(-l_1 l_2)} \rangle - \sum_{\substack{(j', l') \neq (l_1, l_2) \\ k_{j'} = k_{l'} = k}} \langle \hat{b}_{j' \sim l', l_1 \sim l_2}^{(k)} \rangle \langle \beta_{j' l'}^{(2)} \rangle \right). \end{cases}$$



(c) For  $q\left(\beta_{l_1 l_2}^{(2)}\right)$ ,  $k_{l_1} \neq k_{l_2}$ , i.e., for coefficients of the interactions across the networks, we have

$$\begin{aligned}
\log q\left(\beta_{l_1 l_2}^{(2)}\right) &= \mathbb{E}_{(-\beta_{l_1 l_2}^{(2)})} [\log p(\mathbf{y}, \Omega | \mathbf{X}; \tau, \theta)] + \text{const} \\
&= \mathbb{E}_{(-\beta_{l_1 l_2}^{(2)})} \left\{ \mathcal{N}\left(\mathbf{y} | \tilde{\mathbf{X}} \boldsymbol{\beta}, \tau^{-1} \mathbf{I}\right) + \log p\left(\beta_{l_1 l_2}^{(2)} | \gamma_{l_1 l_2}^{(2)}\right) \right. \\
&\quad \left. + \log p\left(\beta_{l_1 l_2}^{(2)} | \gamma_{l_1}^{(1)} \gamma_{l_2}^{(1)}\right) \right\} + \text{const} \\
&= \mathbb{E}_{(-\beta_{l_1 l_2}^{(2)})} \left\{ -\frac{\tau}{2} (\mathbf{y} - \tilde{\mathbf{X}} \boldsymbol{\beta})^T (\mathbf{y} - \tilde{\mathbf{X}} \boldsymbol{\beta}) - \frac{\left(\beta_{l_1 l_2}^{(2)}\right)^2}{2s_1} \gamma_{l_1 l_2}^{(2)} \right. \\
&\quad \left. - \frac{\left(\beta_{l_1 l_2}^{(2)}\right)^2}{2s_2} \left(1 - \gamma_{l_1 l_2}^{(2)}\right) - \frac{\left(\beta_{l_1 l_2}^{(2)}\right)^2}{2s_1} \gamma_{l_1}^{(1)} \gamma_{l_2}^{(1)} - \frac{\left(\beta_{l_1 l_2}^{(2)}\right)^2}{2s_2} \left(1 - \gamma_{l_1}^{(1)} \gamma_{l_2}^{(1)}\right) \right\} \\
&\quad + \text{const} \\
&= \mathbb{E}_{(-\beta_{l_1 l_2}^{(2)})} \left[ -\frac{\tau}{2} \sum_i \left( \text{res}_i^{(-l_1 l_2)} - x_{il_1} x_{il_2} \beta_{l_1 l_2}^{(2)} \right)^2 - \frac{\left(\beta_{l_1 l_2}^{(2)}\right)^2}{2s_1} \gamma_{l_1 l_2}^{(2)} \right. \\
&\quad \left. - \frac{\left(\beta_{l_1 l_2}^{(2)}\right)^2}{2s_1} \gamma_{l_1}^{(1)} \gamma_{l_2}^{(1)} - \frac{\left(\beta_{l_1 l_2}^{(2)}\right)^2}{2s_2} \left(2 - \gamma_{l_1 l_2}^{(2)} - \gamma_{l_1}^{(1)} \gamma_{l_2}^{(1)}\right) \right] + \text{const} \\
&= \tau \beta_{l_1 l_2}^{(2)} \sum_i \left\langle \text{res}_i^{(-l_1 l_2)} \right\rangle x_{il_1} x_{il_2} - \frac{\left(\beta_{l_1 l_2}^{(2)}\right)^2}{2} \left[ \frac{2 - \left\langle \gamma_{l_1 l_2}^{(2)} \right\rangle - \left\langle \gamma_{l_1}^{(1)} \gamma_{l_2}^{(1)} \right\rangle}{s_2} \right. \\
&\quad \left. + \frac{\left\langle \gamma_{l_1 l_2}^{(2)} \right\rangle + \left\langle \gamma_{l_1}^{(1)} \gamma_{l_2}^{(1)} \right\rangle}{s_1} + \tau \sum_i \left( x_{il_1} x_{il_2} \right)^2 \right] + \text{const},
\end{aligned}$$

where  $\text{res}_i^{(-l_1 l_2)} = y_i - \tilde{\mathbf{x}}_i \boldsymbol{\beta} + x_{il_1} x_{il_2} \beta_{l_1 l_2}^{(2)}$ . Thus,  $q\left(\beta_{l_1 l_2}^{(2)}\right) = \mathcal{N}\left(\beta_{l_1 l_2}^{(2)} | m_{l_1 l_2}^{(2)}, \left(\sigma_{l_1 l_2}^{(2)}\right)^2\right)$  with the parameters

$$\begin{cases} \left(\sigma_{l_1 l_2}^{(2)}\right)^2 = \left( \tau \sum_i \left( x_{il_1} x_{il_2} \right)^2 + \frac{\left\langle \gamma_{l_1 l_2}^{(2)} \right\rangle + \left\langle \gamma_{l_1}^{(1)} \gamma_{l_2}^{(1)} \right\rangle}{s_1} + \frac{2 - \left\langle \gamma_{l_1 l_2}^{(2)} \right\rangle - \left\langle \gamma_{l_1}^{(1)} \gamma_{l_2}^{(1)} \right\rangle}{s_2} \right)^{-1}, \\ m_{l_1 l_2}^{(2)} = \left(\sigma_{l_1 l_2}^{(2)}\right)^2 \tau \sum_i x_{il_1} x_{il_2} \left\langle \text{res}_i^{(-l_1 l_2)} \right\rangle. \end{cases}$$

According to (a), (b) and (c), we conclude that

$$Q(\boldsymbol{\beta}) = \prod_{j=1}^p \mathcal{N}\left(\beta_j^{(1)} | m_j^{(1)}, \left(\sigma_j^{(1)}\right)^2\right) \prod_{l_1=1}^p \prod_{l_2 > l_1}^p \mathcal{N}\left(\beta_{l_1 l_2}^{(2)} | m_{l_1 l_2}^{(2)}, \left(\sigma_{l_1 l_2}^{(2)}\right)^2\right) \triangleq \prod_{j=1}^{p(p+1)/2} \mathcal{N}\left(\beta_j | m_j, \sigma_j^2\right).$$

2. For  $q(\boldsymbol{\gamma})$ , assume  $q(\boldsymbol{\gamma}) = \prod_{j=1}^{p(p+1)/2} q(\gamma_j)$ . Consider the following two parts.

(a) For  $q(\gamma_j^{(1)})$ , we have

$$\begin{aligned}
\log q(\gamma_j^{(1)}) &= \mathbb{E}_{(-\gamma_j^{(1)})} [\log p(\mathbf{y}, \Omega | \mathbf{X}; \tau, \theta)] + \text{const} \\
&= \mathbb{E}_{(-\gamma_j^{(1)})} \left[ \log p(\beta_j^{(1)} | \gamma_j^{(1)}) + \log \text{Bern}(\gamma_j^{(1)} | \zeta_j^{(1)}) + \sum_{l \neq j} \log p(\beta_{jl}^{(2)} | \gamma_j^{(1)} \gamma_l^{(1)}) \right] \\
&\quad + \text{const} \\
&= -\gamma_j^{(1)} \left\{ \frac{1}{2} \log \frac{s_1}{s_2} + \frac{1}{2} \left( \frac{1}{s_1} - \frac{1}{s_2} \right) \left\langle (\beta_j^{(1)})^2 \right\rangle + \left\langle \log(1 - \zeta_j^{(1)}) \right\rangle - \left\langle \log \zeta_j^{(1)} \right\rangle \right\} \\
&\quad + \frac{1}{2} \sum_{l \neq j} \left\langle \gamma_l^{(1)} \right\rangle \left[ \log \frac{s_1}{s_2} + \left\langle (\beta_{jl}^{(2)})^2 \right\rangle \left( \frac{1}{s_1} - \frac{1}{s_2} \right) \right] + \text{const}.
\end{aligned}$$

Here we simplify the notation where  $\beta_{jl}^{(2)} = \beta_{lj}^{(2)}$ . With the form of  $q(\boldsymbol{\beta})$ , we have  $\left\langle (\beta_{jl}^{(2)})^2 \right\rangle = (m_{jl}^{(2)})^2 + (\sigma_{jl}^{(2)})^2$ ,  $\left\langle (\beta_j^{(1)})^2 \right\rangle = (m_j^{(1)})^2 + (\sigma_j^{(1)})^2$ . Hence,  $q(\gamma_j^{(1)}) = \text{Bern}(\gamma_j^{(1)} | \eta_j^{(1)})$ , with the parameter

$$\begin{aligned}
\eta_j^{(1)} &= \left( 1 + \exp \left\{ \frac{1}{2} \log \frac{s_1}{s_2} + \frac{1}{2} \left( \frac{1}{s_1} - \frac{1}{s_2} \right) \left( (m_j^{(1)})^2 + (\sigma_j^{(1)})^2 \right) + \left\langle \log(1 - \zeta_j^{(1)}) \right\rangle - \left\langle \log \zeta_j^{(1)} \right\rangle \right. \right. \\
&\quad \left. \left. + \frac{1}{2} \sum_{l \neq j} \left\langle \gamma_l^{(1)} \right\rangle \left[ \log \frac{s_1}{s_2} + \left( (m_{jl}^{(2)})^2 + (\sigma_{jl}^{(2)})^2 \right) \left( \frac{1}{s_1} - \frac{1}{s_2} \right) \right] \right\} \right)^{-1}.
\end{aligned}$$

(b) For  $\gamma_{l_1 l_2}^{(2)}$ , we have

$$\begin{aligned}
\log q(\gamma_{l_1 l_2}^{(2)}) &= \mathbb{E}_{(-\gamma_{l_1 l_2}^{(2)})} [\log p(\mathbf{y}, \Omega | \mathbf{X}; \tau, \theta)] + \text{const} \\
&= \mathbb{E}_{(-\gamma_{l_1 l_2}^{(2)})} \left[ \log p(\beta_{l_1 l_2}^{(2)} | \gamma_{l_1 l_2}^{(2)}) + \log \text{Bern}(\gamma_{l_1 l_2}^{(2)} | \zeta_{l_1 l_2}^{(2)}) \right] + \text{const} \\
&= -\gamma_{l_1 l_2}^{(2)} \left[ \frac{1}{2} \log \frac{s_1}{s_2} + \frac{1}{2} \left( \frac{1}{s_1} - \frac{1}{s_2} \right) \left\langle (\beta_{l_1 l_2}^{(2)})^2 \right\rangle + \left\langle \log(1 - \zeta_{l_1 l_2}^{(2)}) \right\rangle - \left\langle \log \zeta_{l_1 l_2}^{(2)} \right\rangle \right] \\
&\quad + \text{const} \\
&= -\gamma_{l_1 l_2}^{(2)} \left[ \frac{1}{2} \log \frac{s_1}{s_2} + \frac{1}{2} \left( \frac{1}{s_1} - \frac{1}{s_2} \right) \left( (m_{l_1 l_2}^{(2)})^2 + (\sigma_{l_1 l_2}^{(2)})^2 \right) + \left\langle \log(1 - \zeta_{l_1 l_2}^{(2)}) \right\rangle \right. \\
&\quad \left. - \left\langle \log \zeta_{l_1 l_2}^{(2)} \right\rangle \right] + \text{const}.
\end{aligned}$$

Hence  $q\left(\gamma_{l_1 l_2}^{(2)}\right) = \text{Bern}\left(\gamma_{l_1 l_2}^{(2)} | \eta_{l_1 l_2}^{(2)}\right)$  with the parameter

$$\begin{aligned} \eta_{l_1 l_2}^{(2)} = & 1 / \left( 1 + \exp \left( \frac{1}{2} \log \frac{s_1}{s_2} + \frac{1}{2} \left( \frac{1}{s_1} - \frac{1}{s_2} \right) \left( \left( m_{l_1 l_2}^{(2)} \right)^2 + \left( \sigma_{l_1 l_2}^{(2)} \right)^2 \right) \right. \right. \\ & \left. \left. + \left\langle \log \left( 1 - \zeta_{l_1 l_2}^{(2)} \right) \right\rangle - \left\langle \log \zeta_{l_1 l_2}^{(2)} \right\rangle \right) \right). \end{aligned}$$

According to (a), (b), and the structure of  $\gamma$ , we conclude that

$$\begin{aligned} Q(\gamma) &= \prod_{j=1}^p \left( \eta_j^{(1)} \right)^{\gamma_j^{(1)}} \left( 1 - \eta_j^{(1)} \right)^{1 - \gamma_j^{(1)}} \prod_{l_1=1}^p \prod_{l_2 > l_1}^p \left( \eta_{l_1 l_2}^{(2)} \right)^{\gamma_{l_1 l_2}^{(2)}} \left( 1 - \eta_{l_1 l_2}^{(2)} \right)^{1 - \gamma_{l_1 l_2}^{(2)}} \\ &\triangleq \prod_{j=1}^{p(p+1)/2} \left( \eta_j \right)^{\gamma_j} \left( 1 - \eta_j \right)^{1 - \gamma_j}. \end{aligned}$$

3. For  $q(\alpha_k)$ , we have

$$\begin{aligned} \log q(\alpha_k) &= \mathbb{E}_{(-\alpha_k)} [\log p(\mathbf{y}, \Omega | \mathbf{X}; \tau, \theta)] + \text{const} \\ &= \mathbb{E}_{(-\alpha_k)} [\log p(\boldsymbol{\beta}_k | \alpha_k) + \log \text{Bern}(\alpha_k | \theta)] + \text{const} \\ &= -\alpha_k \left[ \frac{\hat{p}_k}{2} \log \frac{s_1}{s_2} - \frac{1}{2} \log |\tilde{\mathbf{L}}_k| + \frac{1}{2} \left\langle \boldsymbol{\beta}_k^\top \left( \frac{1}{s_1} \tilde{\mathbf{L}}_k - \frac{1}{s_2} \mathbf{I} \right) \boldsymbol{\beta}_k \right\rangle \right] \\ &\quad + (1 - \alpha_k) \log(1 - \theta) + \alpha_k \log \theta + \text{const} \\ &= -\alpha_k \left[ \frac{1}{2} \text{tr} \left( \left\langle \boldsymbol{\beta}_k \boldsymbol{\beta}_k^\top \right\rangle \left( \frac{1}{s_1} \tilde{\mathbf{L}}_k - \frac{1}{s_2} \mathbf{I} \right) \right) + \frac{\hat{p}_k}{2} \log \frac{s_1}{s_2} - \frac{1}{2} \log |\tilde{\mathbf{L}}_k| \right] \\ &\quad + \log(1 - \theta) - \log \theta + \text{const}. \end{aligned}$$

Hence,  $q(\alpha_k) = \text{Bern}(\alpha_k | r_k)$  with the parameter

$$\begin{aligned} r_k &= \left[ 1 + \exp \left( \frac{1}{2} \text{tr} \left( \left\langle \boldsymbol{\beta}_k \boldsymbol{\beta}_k^\top \right\rangle \left( \frac{1}{s_1} \tilde{\mathbf{L}}_k - \frac{1}{s_2} \mathbf{I} \right) \right) + \frac{\hat{p}_k}{2} \log \frac{s_1}{s_2} \right. \right. \\ &\quad \left. \left. - \frac{1}{2} \log |\tilde{\mathbf{L}}_k| + \log(1 - \theta) - \log \theta \right) \right]^{-1}. \end{aligned}$$

4. For  $q(\zeta)$ , with the separable structure of  $\zeta$  in the joint probability function, we have  $q(\zeta) = \prod_{j=1}^{p(p+1)/2} q(\zeta_j)$  with

$$\begin{aligned} \log q(\zeta_j) &= \mathbb{E}_{(-\zeta_j)} [\log p(\mathbf{y}, \Omega | \mathbf{X}; \tau, \theta)] + \text{const} \\ &= \mathbb{E}_{(-\zeta_j)} [\log \text{Bern}(\gamma_j | \zeta_j) + \log \text{Beta}(\zeta_j | a, b)] + \text{const} \\ &= (\langle \gamma_j \rangle + a - 1) \log \zeta_j + (b - \langle \gamma_j \rangle) \log(1 - \zeta_j) + \text{const}. \end{aligned}$$

With the form of  $q(\gamma)$ , we have  $\langle \gamma_j \rangle = \eta_j$ . Hence,  $q(\zeta_j) = \text{Beta}(\zeta_j | \tilde{a}_j, \tilde{b}_j)$  with

$$\begin{cases} \tilde{a}_j = \eta_j + a, \\ \tilde{b}_j = 1 - \eta_j + b. \end{cases}$$

Then, we have

$$Q(\boldsymbol{\zeta}) \propto \prod_{j=1}^{p(p+1)/2} (\zeta_j)^{\tilde{a}_j-1} (1 - \zeta_j)^{\tilde{b}_j-1}.$$

### S1.3.2 M-step

We update model parameters  $\tau$  and  $\theta$ . First, we evaluate the lower bound  $\mathcal{L}_q = -\mathbb{E}_q(\log q(\boldsymbol{\beta}, \boldsymbol{\gamma}, \boldsymbol{\alpha}, \boldsymbol{\zeta})) + \mathbb{E}_q(\log p(\mathbf{y}, \boldsymbol{\beta}, \boldsymbol{\gamma}, \boldsymbol{\alpha}, \boldsymbol{\zeta} | \mathbf{X}; \tau, \theta))$ . The first part of the lower bound  $\mathcal{L}_q$ :

$$\begin{aligned} & -\mathbb{E}_q[\log q(\boldsymbol{\beta}, \boldsymbol{\gamma}, \boldsymbol{\alpha}, \boldsymbol{\zeta})] \\ = & -\mathbb{E}_q \left\{ \sum_{k=1}^K \log \text{Bern}(\alpha_k | r_k) + \sum_{j=1}^{p(p+1)/2} [\log \mathcal{N}(\beta_j | m_j, \sigma_j^2) + \log \text{Bern}(\gamma_j | \eta_j) \right. \\ & \left. + \log \text{Beta}(\zeta_j | \tilde{a}_j, \tilde{b}_j)] \right\}. \end{aligned}$$

The second part of  $\mathcal{L}_q$ :

$$\begin{aligned} & \mathbb{E}_q(\log p(\mathbf{y}, \boldsymbol{\beta}, \boldsymbol{\gamma}, \boldsymbol{\alpha}, \boldsymbol{\zeta} | \mathbf{X}; \tau, \theta)) \\ = & \mathbb{E}_q \left\{ \log \mathcal{N}(\mathbf{y} | \tilde{\mathbf{X}} \boldsymbol{\beta}, \tau^{-1} \mathbf{I}) + \sum_{j=1}^{p(p+1)/2} [\gamma_j \log \mathcal{N}(\beta_j | 0, s_1) + (1 - \gamma_j) \log \mathcal{N}(\beta_j | 0, s_2)] \right. \\ & + \log \text{Bern}(\gamma_j | \zeta_j) + \log \text{Beta}(\zeta_j | a, b) + \sum_{k=1}^K [\alpha_k \log \mathcal{N}(\boldsymbol{\beta}_k | \mathbf{0}, s_1 \tilde{\mathbf{L}}_k^{-1}) + (1 - \alpha_k) \mathcal{N}(\boldsymbol{\beta}_k | \mathbf{0}, s_2 \mathbf{I}) \\ & \left. + \log \text{Bern}(\alpha_k | \theta)] + \sum_{l_1=1}^p \sum_{l_2 > l_1}^p \log \mathcal{N}(\beta_{l_1 l_2} | 0, s_1)^{\gamma_{l_1} \gamma_{l_2}} \mathcal{N}(\beta_{l_1 l_2} | 0, s_2)^{1 - \gamma_{l_1} \gamma_{l_2}} \right\}. \end{aligned}$$

By taking derivatives with respect to model parameters and setting them to zero,

$$\begin{aligned} \frac{\partial \mathcal{L}_q}{\partial \tau} &= \frac{n}{2\tau} - \frac{1}{2} \left( \mathbf{y}^T \mathbf{y} - 2\mathbf{y}^T \tilde{\mathbf{X}} \mathbf{m} + \text{tr} \left( \tilde{\mathbf{X}} (\mathbf{m} \mathbf{m}^T + \text{diag}(\boldsymbol{\sigma}^2)) \tilde{\mathbf{X}}^T \right) \right) = 0, \\ \frac{\partial \mathcal{L}_q}{\partial \theta} &= -\sum_{k=1}^K \left( \frac{1 - r_k}{1 - \theta} - \frac{r_k}{\theta} \right) = 0, \end{aligned}$$

we can obtain

$$\begin{aligned} \tau &= \frac{n}{\mathbf{y}^T \mathbf{y} - 2\mathbf{y}^T \tilde{\mathbf{X}} \mathbf{m} + \text{tr} \left( \tilde{\mathbf{X}} (\mathbf{m} \mathbf{m}^T + \text{diag}(\boldsymbol{\sigma}^2)) \tilde{\mathbf{X}}^T \right)}, \\ \theta &= \sum_{k=1}^K \frac{r_k}{K}. \end{aligned} \tag{S3}$$

## S1.4 Variational Bayesian expectation-maximization algorithm for the proposed approach

**Algorithm 1** Variational Bayesian expectation-maximization algorithm for the proposed approach

**Input:**  $\mathbf{X}$ : design matrix;  $\mathbf{y}$ : response;  $G$ : network information;  $p_0$ : initial value of vector  $\mathbf{w} = (r_k \text{'s}, \eta_j^{(1)} \text{'s}, \eta_{l_1 l_2}^{(2)} \text{'s})$ ;  $s_2$ : tuning parameter;  $s_1 = 1$ ;  $a = b = 1$ ;

**Output:** optimal variational parameters for  $q(\Omega)$ ;

Initialize  $\mathbf{m} = (m_j^{(1)} \text{'s}, m_{l_1 l_2}^{(2)} \text{'s}) = \boldsymbol{\sigma} = (\sigma_j^{(1)} \text{'s}, \sigma_{l_1 l_2}^{(2)} \text{'s}) = \mathbf{0}$ ,  $\tilde{\mathbf{a}} = (\tilde{a}_1, \dots, \tilde{a}_p) = (\tilde{a}_j^{(1)} \text{'s}, \tilde{a}_{l_1 l_2}^{(2)} \text{'s}) = \mathbf{1}$ ,  $\tilde{\mathbf{b}} = (\tilde{b}_1, \dots, \tilde{b}_p) = (\tilde{b}_j^{(1)} \text{'s}, \tilde{b}_{l_1 l_2}^{(2)} \text{'s}) = \mathbf{1}$ , for  $1 \leq j \leq p$  and  $1 \leq l_1 < l_2 \leq p$ .  $\tau^{-1} = \text{SD}(\mathbf{y})$ , and  $\theta = \frac{\sum r_k}{K}$ .

**repeat**

**E-step:**

$\mathcal{P} = \{k : r_k > 0.5\}$ ;

**for**  $k \in \mathcal{P}$  **do**

$$r_k = 1 / \left( 1 + \exp \left( \frac{1}{2} \text{tr} \left( (\mathbf{m}_k \mathbf{m}_k^\top + \text{diag}(\boldsymbol{\sigma}_k^2)) \left( \frac{1}{s_1} \tilde{\mathbf{L}}_k - \frac{1}{s_2} \mathbf{I} \right) \right) \right) + \frac{\hat{p}_k}{2} \log \frac{s_1}{s_2} - \frac{1}{2} \log |\tilde{\mathbf{L}}_k| \right) + \log(1 - \theta) - \log \theta);$$

**for**  $j \in V_k$  **do**

$$\left( \sigma_j^{(1)} \right)^2 = \left( \frac{\eta_j^{(1)}}{s_1} + \frac{1 - \eta_j^{(1)}}{s_2} + \langle \hat{\mathbf{b}}_{jj}^{(k)} \rangle + \tau \sum_i (x_{ij})^2 \right)^{-1};$$

$$m_j^{(1)} = \left( \sigma_j^{(1)} \right)^2 \left( \tau \sum_i x_{ij} \langle \text{res}_i^{(-j)} \rangle - \sum_{l \neq j, k_l = k_j} \langle \hat{\mathbf{b}}_{lj}^{(k)} \rangle m_l^{(1)} \right);$$

$$\eta_j^{(1)} = 1 / \left( 1 + \exp \left\{ \psi \left( \tilde{b}_j^{(1)} \right) - \psi \left( \tilde{a}_j^{(1)} \right) + \frac{1}{2} \log \frac{s_1}{s_2} + \frac{1}{2} \left( \left( m_j^{(1)} \right)^2 + \left( \sigma_j^{(1)} \right)^2 \right) \left( \frac{1}{s_1} - \frac{1}{s_2} \right) + \frac{1}{2} \sum_{l \neq j} \eta_l^{(1)} \left( \log \frac{s_1}{s_2} + \left( \left( m_{jl}^{(2)} \right)^2 + \left( \sigma_{jl}^{(2)} \right)^2 \right) \left( \frac{1}{s_1} - \frac{1}{s_2} \right) \right) \right\} \right);$$

$$\tilde{a}_j^{(1)} = \eta_j^{(1)} + a;$$

$$\tilde{b}_j^{(1)} = 1 - \eta_j^{(1)} + b;$$

**for**  $l > j$  and  $l \in V_k$  **do**

$$\left( \sigma_{jl}^{(2)} \right)^2 = \left( \frac{2 - \eta_{jl}^{(2)} - \eta_j^{(1)} \eta_l^{(1)}}{s_2} + \frac{\eta_j^{(1)} \eta_l^{(1)} + \eta_{jl}^{(2)}}{s_1} + \langle \hat{\mathbf{b}}_{j \sim l, j \sim l}^{(k)} \rangle + \tau \sum_i (x_{ij} x_{il})^2 \right)^{-1};$$

$$m_{jl}^{(2)} = \left( \sigma_{jl}^{(2)} \right)^2 \left( \tau \sum_i x_{ij} x_{il} \langle \text{res}_i^{(-jl)} \rangle - \sum_{\substack{(j', l') \neq (j, l) \\ k_{j'} = k_{l'} = k}} \langle \hat{\mathbf{b}}_{j' \sim l', j \sim l}^{(k)} \rangle m_{j'l'}^{(2)} \right);$$

$$\eta_{jl}^{(2)} = 1 / \left( 1 + \exp \left( \frac{1}{2} \log \frac{s_1}{s_2} + \frac{1}{2} \left( \left( m_{jl}^{(2)} \right)^2 + \left( \sigma_{jl}^{(2)} \right)^2 \right) \left( \frac{1}{s_1} - \frac{1}{s_2} \right) + \psi \left( \tilde{b}_{jl}^{(2)} \right) - \psi \left( \tilde{a}_{jl}^{(2)} \right) \right) \right);$$

$$\tilde{a}_{jl}^{(2)} = \eta_{jl}^{(2)} + a;$$

$$\tilde{b}_{jl}^{(2)} = 1 - \eta_{jl}^{(2)} + b;$$

**end for**

**end for**

**for**  $l_1, l_2 \in \{(j', l') | k_{j'}, k_{l'} \in \mathcal{P} \text{ and } k_{j'} \neq k_{l'}\}$  **do**

$$\begin{aligned}
\left(\sigma_{l_1 l_2}^{(2)}\right)^2 &= 1 / \left( \tau \sum_i (x_{il_1} x_{il_2})^2 + \frac{1}{s_1} \left( \eta_{l_1 l_2}^{(2)} + \eta_{l_1}^{(1)} \eta_{l_2}^{(1)} \right) + \frac{1}{s_2} \left( 2 - \eta_{l_1 l_2}^{(2)} - \eta_{l_1}^{(1)} \eta_{l_2}^{(1)} \right) \right); \\
m_{l_1 l_2}^{(2)} &= \tau \sum_i x_{il_1} x_{il_2} \left\langle res_i^{(-l_1 l_2)} \right\rangle \left( \sigma_{l_1 l_2}^{(2)} \right)^2; \\
\eta_{l_1 l_2}^{(2)} &= 1 / \left( 1 + \exp \left( \frac{1}{2} \log \frac{s_1}{s_2} + \frac{1}{2} \left( \left( m_{l_1 l_2}^{(2)} \right)^2 + \left( \sigma_{l_1 l_2}^{(2)} \right)^2 \right) \left( \frac{1}{s_1} - \frac{1}{s_2} \right) + \psi \left( \tilde{b}_{l_1 l_2}^{(2)} \right) \right. \right. \\
&\quad \left. \left. - \psi \left( \tilde{a}_{l_1 l_2}^{(2)} \right) \right) \right); \\
\tilde{a}_{l_1 l_2}^{(2)} &= \eta_{l_1 l_2}^{(2)} + a; \\
\tilde{b}_{l_1 l_2}^{(2)} &= 1 - \eta_{l_1 l_2}^{(2)} + b;
\end{aligned}$$

**end for**

**end for**

**M-step:**

$$\tau = \frac{n}{\mathbf{y}^T \mathbf{y} - 2 \mathbf{y}^T \tilde{\mathbf{X}} \mathbf{m} + \text{tr}(\tilde{\mathbf{X}} (\mathbf{m} \mathbf{m}^T + \text{diag}(\boldsymbol{\sigma}^2)) \tilde{\mathbf{X}}^T)};$$

$$\theta = \sum_{k=1}^K \frac{r_k}{K};$$

**until** the change of  $\Omega$  is smaller than a threshold  $10^{-3}$ .

---

In the algorithm above,

- $\langle \hat{b}_{lj}^{(k)} \rangle$  is the element of matrix  $\mathbf{B}_k^{(1)} = \frac{1}{s_1} \left( r_k \tilde{\mathbf{L}}_k^{(1)} \right) + \frac{1}{s_2} ((1 - r_k) \mathbf{I})$ ;
- $\langle res_i^{(-j)} \rangle = y_i - \tilde{\mathbf{x}}_i \mathbf{m} + x_{ij} m_j^{(1)}$ ,  $\langle res_i^{(-l_1 l_2)} \rangle = y_i - \tilde{\mathbf{x}}_i \mathbf{m} + x_{il_1} x_{il_2} m_{l_1 l_2}^{(2)}$ ;
- $\langle \hat{b}_{lj}^{(k)} \rangle$  is the element of matrix  $\mathbf{B}_k^{(2)} = \frac{1}{s_1} \left( r_k \tilde{\mathbf{L}}_k^{(2)} \right) + \frac{1}{s_2} ((1 - r_k) \mathbf{I})$ ;
- $\psi(x) = \frac{d}{dx} \ln \Gamma(x)$ , where  $\Gamma(x)$  is the gamma function.

## **S2 Results for simulation and data analysis**

This section includes additional results for simulation and data analysis.

## S2.1 Sensitivity analysis for parameter $s_1$

Table S1: Simulation results under the scenarios with  $\rho = 0.4$ ,  $K = 100$ , and  $r = 1/\sqrt{5}$ , and various values of  $s_1$ . In each cell, mean (SD) based on 100 replicates.

| $s_1$ | M:TP        | M:FP       | M:RSSE     | I:TP        | I:FP        | I:RSSE     | PMSE       |
|-------|-------------|------------|------------|-------------|-------------|------------|------------|
| S1    |             |            |            |             |             |            |            |
| 0.5   | 17.90(0.36) | 4.16(1.35) | 0.46(0.07) | 16.86(0.40) | 15.40(5.46) | 0.62(0.08) | 0.89(0.20) |
| 1     | 17.86(0.35) | 2.06(1.06) | 0.35(0.10) | 16.90(0.30) | 9.44(3.64)  | 0.45(0.09) | 0.55(0.10) |
| 2     | 17.86(0.35) | 2.04(1.16) | 0.32(0.11) | 16.90(0.30) | 8.70(3.47)  | 0.41(0.09) | 0.91(0.19) |
| 3     | 17.80(0.40) | 1.76(1.27) | 0.34(0.12) | 16.82(0.39) | 7.88(3.61)  | 0.41(0.09) | 0.95(0.22) |
| 5     | 17.74(0.49) | 1.52(1.22) | 0.36(0.14) | 16.84(0.37) | 7.48(3.86)  | 0.40(0.09) | 0.99(0.25) |
| 8     | 17.60(0.57) | 1.38(1.23) | 0.39(0.15) | 16.76(0.48) | 7.20(4.04)  | 0.41(0.10) | 1.01(0.23) |
| 10    | 17.56(0.61) | 1.30(1.11) | 0.40(0.15) | 16.70(0.51) | 7.12(3.94)  | 0.42(0.11) | 1.03(0.23) |
| 20    | 17.32(0.74) | 1.06(1.11) | 0.46(0.17) | 16.62(0.70) | 7.28(4.53)  | 0.44(0.13) | 1.09(0.24) |
| 30    | 17.14(0.78) | 1.12(1.12) | 0.50(0.17) | 16.50(0.74) | 7.36(4.63)  | 0.47(0.14) | 1.11(0.27) |
| 50    | 16.76(0.96) | 0.96(1.11) | 0.57(0.18) | 16.18(0.87) | 7.24(4.49)  | 0.53(0.14) | 1.16(0.29) |
| 100   | 16.04(1.12) | 0.66(0.72) | 0.69(0.18) | 15.62(1.31) | 5.72(3.61)  | 0.60(0.17) | 1.20(0.27) |
| S2    |             |            |            |             |             |            |            |
| 0.5   | 17.64(0.66) | 2.76(1.65) | 0.45(0.11) | 16.62(0.64) | 12.66(5.27) | 0.66(0.10) | 1.05(0.24) |
| 1     | 17.30(0.79) | 1.77(1.41) | 0.43(0.13) | 16.57(0.68) | 8.17(3.56)  | 0.52(0.12) | 0.69(0.18) |
| 2     | 17.30(0.86) | 1.46(1.30) | 0.40(0.15) | 16.58(0.70) | 7.66(3.98)  | 0.47(0.14) | 1.05(0.25) |
| 3     | 17.14(0.95) | 1.24(1.24) | 0.43(0.16) | 16.56(0.76) | 7.62(4.18)  | 0.46(0.15) | 1.07(0.25) |
| 5     | 16.66(1.17) | 0.70(0.86) | 0.50(0.19) | 16.36(0.90) | 5.56(3.23)  | 0.48(0.16) | 1.13(0.27) |
| 8     | 16.54(1.15) | 0.76(1.00) | 0.53(0.18) | 16.36(0.90) | 5.86(4.03)  | 0.49(0.16) | 1.14(0.27) |
| 10    | 16.40(1.25) | 0.54(0.86) | 0.55(0.19) | 16.26(1.07) | 5.68(4.10)  | 0.49(0.19) | 1.17(0.32) |
| 20    | 16.10(1.23) | 0.60(0.93) | 0.60(0.19) | 15.94(1.13) | 5.94(3.63)  | 0.56(0.20) | 1.21(0.34) |
| 30    | 15.80(1.32) | 0.54(0.84) | 0.65(0.20) | 15.76(1.10) | 5.92(3.94)  | 0.60(0.18) | 1.27(0.35) |
| 50    | 15.24(1.53) | 0.34(0.59) | 0.72(0.21) | 15.26(1.23) | 4.82(3.38)  | 0.67(0.19) | 1.35(0.45) |
| 100   | 14.52(1.53) | 0.24(0.48) | 0.82(0.19) | 14.72(1.51) | 4.38(2.81)  | 0.73(0.22) | 1.45(0.45) |
| S3    |             |            |            |             |             |            |            |
| 0.5   | 17.80(6.91) | 2.58(1.73) | 0.76(0.31) | 14.93(5.90) | 13.18(7.05) | 0.89(0.36) | 1.00(0.45) |
| 1     | 17.63(0.56) | 1.19(1.10) | 0.57(0.10) | 15.04(1.37) | 8.87(4.35)  | 0.77(0.13) | 0.70(0.21) |
| 2     | 17.65(6.87) | 1.23(1.22) | 0.48(0.21) | 14.93(5.94) | 8.57(5.27)  | 0.72(0.32) | 1.02(0.44) |
| 3     | 17.38(6.78) | 0.98(1.03) | 0.49(0.23) | 14.60(5.85) | 7.38(4.63)  | 0.74(0.33) | 1.09(0.47) |
| 5     | 17.02(6.66) | 1.05(1.26) | 0.53(0.26) | 14.07(5.67) | 7.82(5.14)  | 0.79(0.36) | 1.13(0.49) |
| 8     | 16.68(6.54) | 0.95(1.08) | 0.58(0.28) | 13.88(5.62) | 7.70(5.25)  | 0.82(0.36) | 1.15(0.48) |
| 10    | 16.38(6.43) | 0.90(1.05) | 0.62(0.30) | 13.47(5.47) | 7.62(5.28)  | 0.86(0.37) | 1.21(0.52) |
| 20    | 15.43(6.05) | 0.55(0.81) | 0.76(0.33) | 12.32(5.01) | 6.03(4.22)  | 0.96(0.39) | 1.34(0.60) |
| 30    | 14.80(5.83) | 0.38(0.68) | 0.83(0.35) | 11.62(4.78) | 4.70(3.63)  | 1.01(0.41) | 1.37(0.63) |
| 50    | 14.32(5.63) | 0.17(0.37) | 0.89(0.36) | 11.05(4.55) | 4.08(3.03)  | 1.05(0.42) | 1.40(0.62) |
| 100   | 13.43(5.32) | 0.17(0.37) | 0.98(0.40) | 10.05(4.20) | 3.70(2.83)  | 1.12(0.45) | 1.45(0.67) |
| S4    |             |            |            |             |             |            |            |
| 0.5   | 17.85(6.93) | 3.45(1.99) | 0.44(0.19) | 14.45(5.78) | 20.68(9.03) | 0.89(0.37) | 1.16(0.51) |
| 1     | 17.94(0.24) | 2.10(1.12) | 0.37(0.07) | 13.37(2.17) | 15.10(3.98) | 0.92(0.20) | 0.77(0.20) |
| 2     | 17.90(6.95) | 2.38(1.47) | 0.36(0.16) | 14.18(5.72) | 16.60(7.41) | 0.84(0.37) | 1.16(0.57) |
| 3     | 17.82(6.93) | 2.05(1.33) | 0.37(0.17) | 13.80(5.61) | 15.60(7.03) | 0.87(0.39) | 1.24(0.62) |
| 5     | 17.80(6.92) | 1.77(1.26) | 0.39(0.18) | 13.43(5.46) | 15.18(6.65) | 0.92(0.40) | 1.24(0.61) |
| 8     | 17.55(6.83) | 1.50(1.20) | 0.44(0.21) | 12.97(5.37) | 14.25(6.47) | 0.96(0.42) | 1.28(0.63) |
| 10    | 17.58(6.83) | 1.52(1.22) | 0.44(0.21) | 12.78(5.29) | 14.22(6.47) | 0.98(0.43) | 1.31(0.65) |
| 20    | 17.02(6.65) | 1.02(0.91) | 0.53(0.25) | 11.78(5.01) | 12.70(5.66) | 1.08(0.47) | 1.40(0.65) |
| 30    | 16.75(6.55) | 0.80(0.82) | 0.57(0.27) | 11.43(4.88) | 11.95(5.61) | 1.12(0.48) | 1.46(0.70) |
| 50    | 16.08(6.34) | 0.60(0.79) | 0.67(0.31) | 10.25(4.50) | 10.62(5.26) | 1.22(0.51) | 1.62(0.78) |
| 100   | 14.93(5.86) | 0.35(0.50) | 0.83(0.34) | 9.05(4.00)  | 9.18(4.27)  | 1.32(0.54) | 1.78(0.84) |



## S2.2 Computer time

Table S2: Computer time (minutes) of the proposed analysis with fixed tuning parameters. In each cell, mean based on 100 replicates.

|            | $n = 150$ | $n = 200$ | $n = 250$ | $n = 300$ | $n = 400$ | $n = 500$ |
|------------|-----------|-----------|-----------|-----------|-----------|-----------|
| $p = 200$  | 0.052     | 0.052     | 0.052     | 0.056     | 0.057     | 0.063     |
| $p = 300$  | 0.082     | 0.085     | 0.083     | 0.085     | 0.090     | 0.097     |
| $p = 400$  | 0.110     | 0.109     | 0.109     | 0.123     | 0.126     | 0.155     |
| $p = 500$  | 0.139     | 0.128     | 0.149     | 0.152     | 0.146     | 0.187     |
| $p = 600$  | 0.171     | 0.174     | 0.165     | 0.222     | 0.325     | 0.459     |
| $p = 800$  | 0.225     | 0.241     | 0.244     | 0.347     | 0.614     | 0.770     |
| $p = 1000$ | 0.289     | 0.312     | 0.338     | 0.487     | 0.850     | 1.036     |
| $p = 1200$ | 0.443     | 0.524     | 0.779     | 0.971     | 1.412     | 1.736     |
| $p = 1400$ | 0.666     | 0.848     | 1.150     | 1.540     | 1.941     | 3.102     |

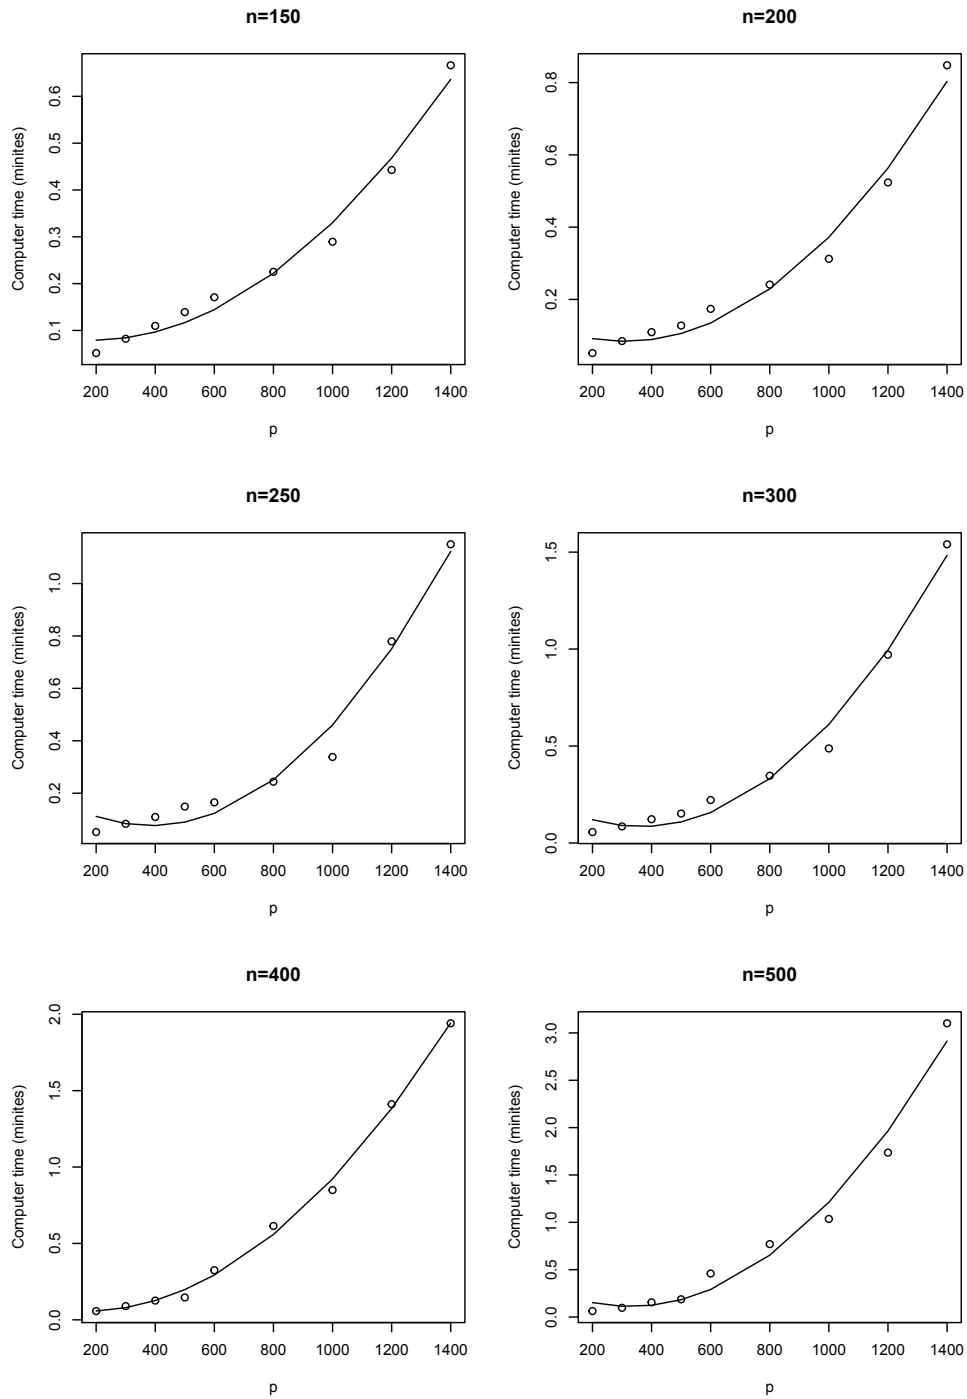

Figure S2: Computer time of the proposed analysis with various  $p$  values with a given sample size  $n$ .

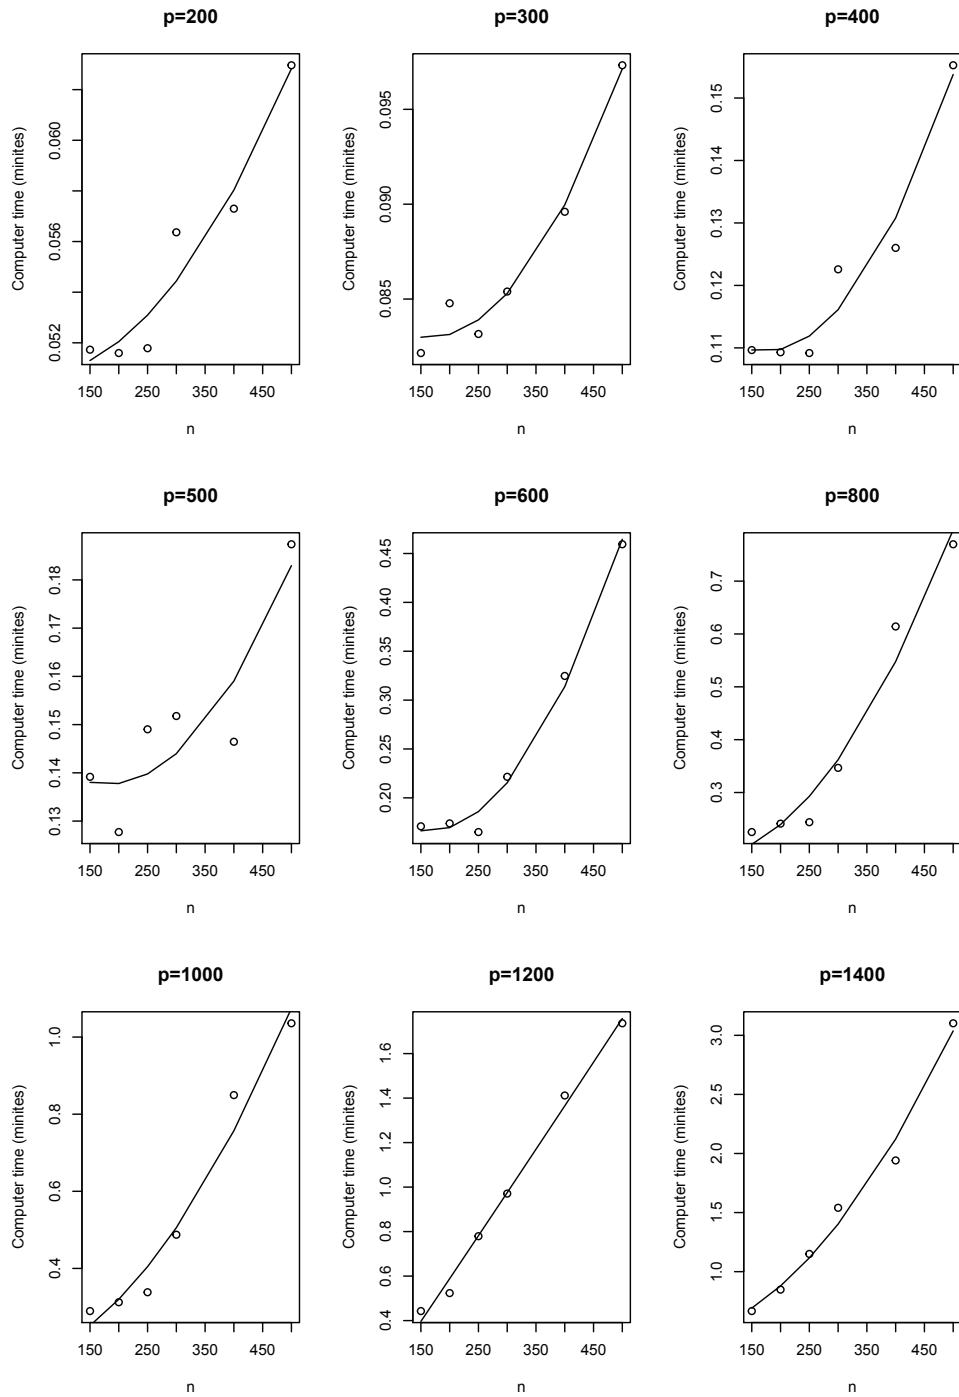

Figure S3: Computer time of the proposed analysis with various  $n$  values with a given number of genetic factors  $p$ .

### S2.3 Detailed simulation settings

We set that only the first three networks have effects on the response. Specifically, taking  $z_i$  generated from  $\text{Uniform}(0.8, 1.2)$ ,  $i = 1, 2, 3, 4$ , and  $(n_1, n_2, n_3) = (5, 5, 2)$ , we consider

1. S1: all signals are positive.

$$\beta_k = \left( z_k, \underbrace{rz_k, \dots, rz_k}_5, \underbrace{0, \dots, 0}_{p_k-6}, \underbrace{rz_k, \dots, rz_k}_{n_k}, 0, \dots, 0 \right)^T, \quad k = 1, 2, 3,$$

$$\beta_{12}^{(2)} = \left( \underbrace{rz_4, \dots, rz_4}_5, 0, \dots, 0 \right)^T;$$

2. S2 is the same as S1 except that the signals in the second network and those of interactions between the first and second networks are negative, i.e.,

$$\beta_2 = \left( -z_2, \underbrace{-rz_2, \dots, -rz_2}_5, \underbrace{0, \dots, 0}_{p_2-6}, \underbrace{-rz_2, \dots, -rz_2}_{n_2}, 0, \dots, 0 \right)^T,$$

$$\beta_k = \left( z_k, \underbrace{rz_k, \dots, rz_k}_5, \underbrace{0, \dots, 0}_{p_k-6}, \underbrace{rz_k, \dots, rz_k}_{n_k}, 0, \dots, 0 \right)^T, \quad k = 1, 3,$$

$$\beta_{12}^{(2)} = \left( \underbrace{-rz_4, \dots, -rz_4}_5, 0, \dots, 0 \right)^T;$$

3. S3: Within each network, the signals can be either positive or negative.

$$\beta_k = \left( z_k, -rz_k, -rz_k, rz_k, rz_k, rz_k, \underbrace{0, \dots, 0}_{p_k-6}, \underbrace{-rz_k, rz_k, \dots, rz_k}_4, 0, \dots, 0 \right)^T, \quad \text{for } k = 1, 2,$$

$$\beta_3 = \left( z_3, -rz_3, \underbrace{rz_3, \dots, rz_3}_4, \underbrace{0, \dots, 0}_{p_k-6}, rz_3, rz_3, 0, \dots, 0 \right)^T,$$

$$\beta_{12}^{(2)} = \left( -rz_4, \underbrace{rz_4, \dots, rz_4}_4, 0, \dots, 0 \right)^T;$$

4. S4: the important interactions only involve none-TF main effects with weaker signals.

$$\beta_k = \left( z_k, \underbrace{rz_k, \dots, rz_k}_5, \underbrace{0, \dots, 0}_{2p_k-7}, \underbrace{rz_k, \dots, rz_k}_{n_k}, 0, \dots, 0 \right)^T, \quad k = 1, 2, 3,$$

$$\beta_{12}^{(2)} = \left( \underbrace{0, \dots, 0}_{p_k}, \underbrace{rz_4, \dots, rz_4}_5, 0, \dots, 0 \right)^T.$$

## S2.4 Additional Simulation Results

Table S3: Simulation results under the scenarios with  $\rho = 0.4$ ,  $K = 50$ , and  $r = 1/\sqrt{5}$ . In each cell, mean (SD) based on 100 replicates.

| Approach   | M:TP        | M:FP        | M:RSSE     | I:TP        | I:FP           | I:RSSE     | PMSE         |
|------------|-------------|-------------|------------|-------------|----------------|------------|--------------|
| S1         |             |             |            |             |                |            |              |
| proposed   | 16.77(1.07) | 3.70(2.94)  | 0.63(0.13) | 15.83(1.02) | 10.07(5.49)    | 0.62(0.15) | 0.73(0.16)   |
| triBayes   | 15.86(1.44) | 14.60(4.57) | 1.31(0.09) | 6.66(1.26)  | 7.80(2.09)     | 1.36(0.07) | 2.17(0.55)   |
| glinternet | 17.38(0.95) | 6.70(3.21)  | 0.97(0.10) | 14.44(1.72) | 6.18(2.80)     | 1.05(0.11) | 1.57(0.42)   |
| Lasso      | 7.02(2.06)  | 0.04(0.20)  | 1.51(0.08) | 10.56(2.50) | 15.66(7.01)    | 1.26(0.12) | 2.41(0.77)   |
| iFORM      | 15.90(2.31) | 37.68(4.51) | 1.43(0.38) | 11.70(4.39) | 31.32(3.99)    | 1.37(0.37) | 2.39(1.18)   |
| HierNet    | 13.28(3.43) | 1.36(1.59)  | 1.27(0.17) | 7.98(2.74)  | 9.04(6.24)     | 1.38(0.13) | 2.48(0.77)   |
| Grace      | 8.88(2.24)  | 0.84(0.96)  | 1.50(0.12) | 11.70(1.96) | 10.90(7.27)    | 1.26(0.10) | 2.35(0.63)   |
| GEL        | 10.98(2.24) | 25.62(6.15) | 2.98(0.89) | 7.18(2.05)  | 340.74(77.28)  | 9.44(3.82) | 31.38(28.41) |
| S2         |             |             |            |             |                |            |              |
| proposed   | 16.02(1.09) | 2.90(2.26)  | 0.64(0.14) | 16.33(1.10) | 7.48(4.48)     | 0.57(0.15) | 0.80(0.24)   |
| triBayes   | 16.38(1.47) | 12.16(4.40) | 1.38(0.30) | 5.02(3.15)  | 1.46(1.70)     | 1.44(0.14) | 2.60(1.20)   |
| glinternet | 17.36(0.94) | 6.18(3.81)  | 0.94(0.11) | 14.78(1.37) | 5.26(3.13)     | 1.02(0.12) | 1.44(0.40)   |
| Lasso      | 7.24(3.07)  | 0.16(0.42)  | 1.46(0.11) | 8.26(3.64)  | 42.76(92.48)   | 1.41(0.14) | 2.67(0.85)   |
| iFORM      | 15.58(2.37) | 37.76(3.59) | 1.48(0.39) | 12.16(4.10) | 31.32(4.57)    | 1.42(0.41) | 2.52(1.20)   |
| HierNet    | 13.24(3.10) | 1.52(1.69)  | 1.23(0.17) | 9.40(2.77)  | 8.54(5.36)     | 1.35(0.15) | 2.00(0.55)   |
| Grace      | 5.42(1.67)  | 0.36(0.56)  | 1.73(0.05) | 5.04(1.29)  | 8.86(8.27)     | 1.49(0.06) | 3.37(0.95)   |
| GEL        | 11.16(2.10) | 26.18(5.68) | 2.76(0.76) | 8.56(1.97)  | 346.44(71.58)  | 8.61(2.97) | 25.87(24.97) |
| S3         |             |             |            |             |                |            |              |
| proposed   | 15.63(1.70) | 3.77(3.80)  | 0.90(0.13) | 11.58(2.10) | 8.44(6.28)     | 1.04(0.12) | 0.99(0.28)   |
| triBayes   | 12.32(2.07) | 6.58(4.76)  | 1.94(0.33) | 0.82(1.79)  | 0.78(1.79)     | 1.54(0.23) | 3.35(1.19)   |
| glinternet | 13.12(2.68) | 3.64(3.35)  | 1.40(0.16) | 6.96(3.00)  | 2.42(2.33)     | 1.40(0.10) | 2.16(0.64)   |
| Lasso      | 5.94(2.28)  | 0.08(0.27)  | 1.74(0.14) | 6.80(1.91)  | 9.16(5.15)     | 1.39(0.08) | 2.54(0.68)   |
| iFORM      | 15.88(2.42) | 37.74(4.54) | 1.46(0.43) | 10.82(4.13) | 32.62(4.11)    | 1.42(0.36) | 2.31(1.29)   |
| HierNet    | 9.50(2.46)  | 0.94(1.13)  | 1.53(0.14) | 5.20(2.19)  | 5.32(4.28)     | 1.44(0.08) | 2.30(0.64)   |
| Grace      | 8.72(1.51)  | 0.94(1.15)  | 1.58(0.11) | 10.20(1.60) | 18.64(13.34)   | 1.31(0.07) | 2.03(0.52)   |
| GEL        | 9.02(3.17)  | 23.26(9.22) | 2.51(0.50) | 4.78(2.61)  | 303.18(109.17) | 7.13(2.18) | 17.17(9.91)  |
| S4         |             |             |            |             |                |            |              |
| proposed   | 16.69(1.24) | 2.56(2.40)  | 0.62(0.15) | 10.56(2.48) | 11.38(3.71)    | 1.14(0.19) | 0.97(0.22)   |
| triBayes   | 16.62(1.43) | 11.90(7.24) | 1.55(0.34) | 0.06(0.24)  | 2.08(2.12)     | 1.65(0.05) | 3.13(1.54)   |
| glinternet | 15.66(1.84) | 4.24(2.76)  | 1.09(0.18) | 6.90(2.87)  | 5.52(2.67)     | 1.47(0.09) | 1.79(0.46)   |
| Lasso      | 6.96(2.15)  | 0.10(0.36)  | 1.51(0.08) | 3.82(2.24)  | 9.58(5.87)     | 1.56(0.06) | 2.55(0.70)   |
| iFORM      | 11.78(3.03) | 44.44(4.66) | 2.34(0.53) | 2.96(3.54)  | 39.06(3.87)    | 2.25(0.33) | 5.13(2.26)   |
| HierNet    | 12.16(3.22) | 0.80(1.03)  | 1.29(0.18) | 4.96(2.52)  | 8.00(4.72)     | 1.69(0.13) | 2.04(0.67)   |
| Grace      | 8.46(1.98)  | 0.48(0.68)  | 1.48(0.08) | 4.16(2.54)  | 11.76(7.45)    | 1.63(0.08) | 2.42(0.61)   |
| GEL        | 11.88(0.87) | 26.66(5.55) | 2.80(0.66) | 7.30(1.75)  | 354.38(75.68)  | 8.96(2.97) | 28.46(21.82) |

Table S4: Simulation results under the scenarios with  $\rho = 0.4$ ,  $K = 50$ , and  $r = 1/\sqrt{12}$ . In each cell, mean (SD) based on 100 replicates.

| <b>Approach</b> | <b>M:TP</b> | <b>M:FP</b>  | <b>M:RSSE</b> | <b>I:TP</b> | <b>I:FP</b>    | <b>I:RSSE</b> | <b>PMSE</b>  |
|-----------------|-------------|--------------|---------------|-------------|----------------|---------------|--------------|
| S1              |             |              |               |             |                |               |              |
| proposed        | 15.24(1.78) | 2.42(2.46)   | 0.60(0.09)    | 13.46(2.06) | 4.66(3.54)     | 0.57(0.13)    | 0.72(0.19)   |
| triBayes        | 14.94(2.25) | 11.28(6.59)  | 1.32(0.26)    | 3.74(2.54)  | 1.62(1.59)     | 0.93(0.07)    | 1.71(0.68)   |
| glinetnet       | 14.80(2.56) | 3.54(2.57)   | 0.77(0.09)    | 10.72(2.63) | 3.26(2.10)     | 0.80(0.06)    | 1.23(0.38)   |
| Lasso           | 5.30(1.66)  | 0.12(0.39)   | 1.02(0.06)    | 8.34(2.06)  | 11.84(5.53)    | 0.88(0.07)    | 1.47(0.42)   |
| iFORM           | 11.30(2.04) | 45.18(4.34)  | 1.61(0.19)    | 4.84(2.03)  | 35.34(2.98)    | 1.39(0.12)    | 2.61(0.84)   |
| HierNet         | 9.38(2.68)  | 0.46(0.76)   | 0.93(0.06)    | 5.32(2.28)  | 5.22(4.34)     | 0.95(0.06)    | 1.52(0.39)   |
| Grace           | 6.46(1.42)  | 0.60(0.76)   | 1.03(0.05)    | 9.52(1.73)  | 8.94(5.53)     | 0.86(0.06)    | 1.52(0.36)   |
| GEL             | 11.76(1.19) | 28.24(1.19)  | 2.21(0.33)    | 7.70(1.63)  | 372.30(1.63)   | 6.81(1.21)    | 15.48(6.96)  |
| S2              |             |              |               |             |                |               |              |
| proposed        | 14.56(1.58) | 2.80(2.39)   | 0.60(0.10)    | 14.05(1.41) | 4.34(3.31)     | 0.54(0.11)    | 0.72(0.19)   |
| triBayes        | 13.22(3.07) | 6.02(6.71)   | 1.46(0.25)    | 1.46(2.41)  | 0.10(0.36)     | 1.02(0.07)    | 2.47(1.01)   |
| glinetnet       | 14.96(2.51) | 4.40(2.65)   | 0.71(0.10)    | 12.16(2.88) | 3.08(2.20)     | 0.77(0.09)    | 1.13(0.33)   |
| Lasso           | 5.46(2.28)  | 0.20(0.57)   | 0.98(0.06)    | 6.12(3.20)  | 50.92(106.17)  | 0.98(0.08)    | 1.65(0.45)   |
| iFORM           | 10.96(2.63) | 45.04(3.90)  | 1.59(0.21)    | 5.76(2.58)  | 34.68(4.06)    | 1.41(0.14)    | 2.39(0.68)   |
| HierNet         | 9.80(2.59)  | 0.86(1.05)   | 0.88(0.08)    | 7.50(2.43)  | 6.72(4.29)     | 0.93(0.08)    | 1.31(0.34)   |
| Grace           | 4.16(1.23)  | 0.32(0.55)   | 1.34(0.03)    | 3.84(1.38)  | 7.24(6.53)     | 0.99(0.04)    | 2.12(0.55)   |
| GEL             | 11.50(1.72) | 26.74(5.83)  | 2.14(0.50)    | 8.78(1.83)  | 352.86(75.75)  | 6.39(1.83)    | 13.56(6.71)  |
| S3              |             |              |               |             |                |               |              |
| proposed        | 13.40(2.35) | 3.46(3.42)   | 0.82(0.07)    | 8.23(2.31)  | 4.33(3.46)     | 0.81(0.08)    | 0.88(0.19)   |
| triBayes        | 10.02(1.77) | 1.22(1.00)   | 1.73(0.02)    | 0.00(0.00)  | 0.00(0.00)     | 1.03(0.00)    | 2.45(0.62)   |
| glinetnet       | 9.70(2.98)  | 2.14(2.08)   | 1.02(0.10)    | 3.92(2.52)  | 1.20(1.47)     | 0.96(0.05)    | 1.36(0.33)   |
| Lasso           | 5.10(1.56)  | 0.14(0.45)   | 1.21(0.09)    | 5.40(1.80)  | 7.94(5.28)     | 0.93(0.05)    | 1.52(0.36)   |
| iFORM           | 11.96(2.45) | 44.62(3.87)  | 1.54(0.20)    | 4.40(2.34)  | 35.80(4.32)    | 1.38(0.15)    | 2.34(0.65)   |
| HierNet         | 7.40(2.20)  | 0.58(0.70)   | 1.08(0.09)    | 3.58(1.74)  | 4.22(3.89)     | 0.96(0.04)    | 1.38(0.33)   |
| Grace           | 6.56(1.58)  | 0.68(0.91)   | 1.15(0.09)    | 8.08(1.78)  | 12.04(9.38)    | 0.88(0.04)    | 1.35(0.31)   |
| GEL             | 10.22(3.01) | 23.94(10.64) | 1.96(0.57)    | 5.56(2.58)  | 310.62(138.18) | 5.64(3.00)    | 12.98(12.07) |
| S4              |             |              |               |             |                |               |              |
| proposed        | 14.58(2.34) | 2.79(3.29)   | 0.64(0.10)    | 6.50(3.07)  | 7.38(2.80)     | 0.93(0.14)    | 0.91(0.23)   |
| triBayes        | 13.56(2.67) | 5.82(7.92)   | 1.55(0.23)    | 0.00(0.00)  | 0.36(0.78)     | 1.04(0.02)    | 2.74(1.11)   |
| glinetnet       | 11.62(3.28) | 1.66(1.89)   | 0.85(0.10)    | 3.12(2.33)  | 2.66(1.86)     | 1.00(0.04)    | 1.28(0.31)   |
| Lasso           | 5.20(1.58)  | 0.06(0.24)   | 1.01(0.04)    | 2.22(1.75)  | 6.40(3.73)     | 1.02(0.03)    | 1.51(0.38)   |
| iFORM           | 9.42(2.17)  | 48.10(4.54)  | 1.91(0.22)    | 0.96(1.37)  | 39.58(3.64)    | 1.67(0.14)    | 3.43(0.98)   |
| HierNet         | 8.90(2.59)  | 0.50(0.74)   | 0.93(0.08)    | 2.48(1.85)  | 5.14(3.33)     | 1.10(0.09)    | 1.33(0.34)   |
| Grace           | 6.18(1.60)  | 0.54(0.68)   | 1.01(0.04)    | 2.26(1.86)  | 7.78(5.47)     | 1.05(0.04)    | 1.54(0.37)   |
| GEL             | 11.92(0.57) | 27.44(3.96)  | 2.26(0.55)    | 7.50(1.45)  | 364.96(52.54)  | 6.88(1.96)    | 16.05(9.81)  |

Table S5: Simulation results under the scenarios with  $\rho = 0.6$ ,  $K = 100$ , and  $r = 1/\sqrt{5}$ . In each cell, mean (SD) based on 100 replicates.

| <b>Approach</b> | <b>M:TP</b> | <b>M:FP</b> | <b>M:RSSE</b> | <b>I:TP</b> | <b>I:FP</b>  | <b>I:RSSE</b> | <b>PMSE</b> |
|-----------------|-------------|-------------|---------------|-------------|--------------|---------------|-------------|
| S1              |             |             |               |             |              |               |             |
| proposed        | 17.96(0.20) | 1.94(1.12)  | 0.42(0.08)    | 16.90(0.36) | 6.58(2.78)   | 0.44(0.10)    | 0.54(0.12)  |
| triBayes        | 17.46(0.95) | 12.60(2.32) | 1.21(0.07)    | 7.94(1.32)  | 4.96(1.28)   | 1.27(0.06)    | 2.37(0.65)  |
| glinternet      | 17.98(0.14) | 6.56(3.60)  | 0.85(0.12)    | 16.02(1.00) | 8.34(3.84)   | 0.84(0.12)    | 1.15(0.36)  |
| Lasso           | 5.88(1.60)  | 0.02(0.14)  | 1.58(0.06)    | 10.64(1.88) | 6.92(3.71)   | 1.26(0.11)    | 2.77(0.71)  |
| iFORM           | 15.20(1.96) | 38.54(3.86) | 1.59(0.31)    | 8.18(2.98)  | 34.08(3.39)  | 1.72(0.24)    | 3.35(1.45)  |
| HierNet         | 16.30(1.80) | 1.72(1.85)  | 1.18(0.21)    | 9.62(2.32)  | 10.86(4.60)  | 1.35(0.13)    | 3.06(1.23)  |
| Grace           | 10.10(3.37) | 1.18(2.25)  | 1.49(0.27)    | 12.22(1.94) | 7.10(7.84)   | 1.54(0.15)    | 2.57(0.93)  |
| GEL             | 17.88(0.33) | 3.38(2.73)  | 0.68(0.17)    | 12.10(1.04) | 28.54(28.02) | 1.25(0.42)    | 1.15(0.38)  |
| S2              |             |             |               |             |              |               |             |
| proposed        | 17.57(0.63) | 1.43(1.04)  | 0.41(0.10)    | 16.87(0.43) | 6.10(2.26)   | 0.47(0.08)    | 0.73(0.21)  |
| triBayes        | 17.18(1.52) | 10.12(2.39) | 1.25(0.26)    | 6.86(2.64)  | 2.52(1.78)   | 1.38(0.12)    | 2.86(1.54)  |
| glinternet      | 17.74(0.63) | 5.44(2.90)  | 0.90(0.12)    | 15.78(1.17) | 7.02(3.20)   | 0.87(0.11)    | 1.07(0.26)  |
| Lasso           | 12.02(2.54) | 0.30(0.54)  | 1.42(0.14)    | 13.18(1.97) | 33.44(61.65) | 1.15(0.13)    | 1.97(0.60)  |
| iFORM           | 14.38(2.74) | 38.68(4.62) | 1.73(0.47)    | 8.02(3.23)  | 34.78(3.66)  | 1.78(0.27)    | 2.91(1.28)  |
| HierNet         | 15.80(2.04) | 1.26(1.27)  | 1.25(0.18)    | 8.90(1.91)  | 10.18(4.74)  | 1.49(0.12)    | 2.12(0.60)  |
| Grace           | 5.02(1.45)  | 0.30(0.51)  | 1.78(0.06)    | 4.70(1.25)  | 2.72(3.02)   | 1.52(0.07)    | 4.71(1.57)  |
| GEL             | 17.36(1.27) | 5.74(4.56)  | 0.83(0.24)    | 12.52(1.05) | 57.38(54.29) | 1.73(0.88)    | 1.39(0.50)  |
| S3              |             |             |               |             |              |               |             |
| proposed        | 17.92(0.27) | 0.92(1.01)  | 0.64(0.07)    | 16.33(0.76) | 6.92(2.85)   | 0.69(0.11)    | 0.61(0.16)  |
| triBayes        | 12.90(2.25) | 9.64(3.41)  | 1.89(0.22)    | 2.68(3.08)  | 1.12(1.59)   | 1.54(0.11)    | 3.55(1.31)  |
| glinternet      | 15.00(1.54) | 4.84(2.95)  | 1.28(0.10)    | 9.66(1.78)  | 5.64(2.99)   | 1.29(0.08)    | 1.70(0.43)  |
| Lasso           | 8.84(1.78)  | 0.10(0.30)  | 1.62(0.11)    | 8.90(1.75)  | 11.34(4.86)  | 1.29(0.07)    | 1.90(0.44)  |
| iFORM           | 14.00(3.08) | 39.68(4.98) | 1.79(0.46)    | 6.38(3.76)  | 35.78(4.24)  | 1.86(0.30)    | 3.23(1.55)  |
| HierNet         | 11.50(1.28) | 0.84(0.98)  | 1.39(0.11)    | 6.00(1.76)  | 6.06(3.76)   | 1.44(0.08)    | 2.07(0.55)  |
| Grace           | 8.48(1.71)  | 0.34(0.48)  | 1.59(0.13)    | 11.46(1.68) | 7.40(8.39)   | 1.66(0.10)    | 2.17(0.61)  |
| GEL             | 16.44(2.31) | 8.42(4.87)  | 0.98(0.23)    | 11.18(2.50) | 93.32(59.19) | 2.20(0.69)    | 1.55(0.44)  |
| S4              |             |             |               |             |              |               |             |
| proposed        | 18.00(0.00) | 2.65(1.98)  | 0.41(0.07)    | 12.67(2.29) | 20.60(4.94)  | 1.09(0.22)    | 0.73(0.21)  |
| triBayes        | 17.36(1.35) | 10.14(3.02) | 1.30(0.27)    | 0.70(1.46)  | 7.60(3.29)   | 1.69(0.09)    | 2.81(1.49)  |
| glinternet      | 17.20(1.37) | 5.68(3.35)  | 0.87(0.20)    | 11.14(3.04) | 9.74(3.74)   | 1.43(0.16)    | 1.42(0.43)  |
| Lasso           | 11.54(2.42) | 0.14(0.35)  | 1.44(0.15)    | 8.68(2.58)  | 16.90(6.45)  | 1.56(0.15)    | 1.82(0.52)  |
| iFORM           | 10.28(3.15) | 44.20(4.81) | 2.71(0.63)    | 1.82(3.01)  | 40.28(3.66)  | 2.58(0.36)    | 6.21(2.63)  |
| HierNet         | 15.82(1.86) | 1.50(1.18)  | 1.12(0.17)    | 9.54(2.28)  | 10.06(4.09)  | 1.85(0.19)    | 1.53(0.39)  |
| Grace           | 10.46(2.83) | 0.50(0.74)  | 1.53(0.16)    | 4.24(2.49)  | 14.76(9.31)  | 1.98(0.10)    | 2.23(0.54)  |
| GEL             | 17.74(0.49) | 3.62(2.93)  | 0.72(0.17)    | 11.54(0.91) | 24.92(33.28) | 1.30(0.55)    | 1.12(0.40)  |

Table S6: Simulation results under the scenarios with  $\rho = 0.6$ ,  $K = 100$ , and  $r = 1/\sqrt{12}$ . In each cell, mean (SD) based on 100 replicates.

| <b>Approach</b> | <b>M:TP</b> | <b>M:FP</b> | <b>M:RSSE</b> | <b>I:TP</b> | <b>I:FP</b>  | <b>I:RSSE</b> | <b>PMSE</b> |
|-----------------|-------------|-------------|---------------|-------------|--------------|---------------|-------------|
| S1              |             |             |               |             |              |               |             |
| proposed        | 17.36(0.62) | 0.46(0.58)  | 0.47(0.08)    | 16.29(0.81) | 2.07(1.39)   | 0.35(0.10)    | 0.54(0.11)  |
| triBayes        | 16.76(2.31) | 9.32(2.78)  | 1.22(0.21)    | 5.64(2.55)  | 2.82(1.52)   | 0.89(0.07)    | 1.85(1.15)  |
| glinternet      | 17.02(1.17) | 4.44(2.71)  | 0.64(0.09)    | 14.04(1.70) | 5.14(3.30)   | 0.67(0.06)    | 0.99(0.27)  |
| Lasso           | 6.68(2.01)  | 0.02(0.14)  | 1.01(0.06)    | 10.58(1.60) | 10.20(4.95)  | 0.82(0.07)    | 1.40(0.33)  |
| iFORM           | 10.92(1.93) | 44.24(3.84) | 1.68(0.17)    | 3.58(1.43)  | 37.24(3.15)  | 1.49(0.10)    | 3.14(0.90)  |
| HierNet         | 13.44(2.07) | 0.64(0.90)  | 0.88(0.11)    | 8.08(1.99)  | 7.42(3.90)   | 0.95(0.08)    | 1.69(0.52)  |
| Grace           | 8.08(2.20)  | 0.42(0.67)  | 1.01(0.09)    | 10.62(1.96) | 5.22(5.86)   | 1.00(0.09)    | 1.64(0.50)  |
| GEL             | 17.08(1.07) | 3.82(3.77)  | 0.64(0.15)    | 10.62(1.74) | 36.90(44.59) | 1.12(0.64)    | 1.03(0.40)  |
| S2              |             |             |               |             |              |               |             |
| proposed        | 16.58(1.14) | 0.54(0.91)  | 0.48(0.07)    | 16.14(1.05) | 2.22(1.72)   | 0.37(0.10)    | 0.56(0.13)  |
| triBayes        | 14.40(3.31) | 4.86(5.07)  | 1.39(0.25)    | 2.64(3.29)  | 0.46(0.81)   | 0.99(0.09)    | 2.82(1.38)  |
| glinternet      | 16.80(1.14) | 4.16(2.35)  | 0.62(0.08)    | 14.00(1.53) | 4.64(2.20)   | 0.69(0.07)    | 0.89(0.21)  |
| Lasso           | 7.66(2.45)  | 0.28(0.54)  | 0.99(0.08)    | 9.52(2.45)  | 21.32(53.10) | 0.87(0.08)    | 1.47(0.36)  |
| iFORM           | 10.30(2.72) | 44.66(4.16) | 1.72(0.23)    | 3.62(1.58)  | 37.10(3.07)  | 1.49(0.09)    | 2.62(0.79)  |
| HierNet         | 12.86(2.76) | 0.72(1.05)  | 0.88(0.12)    | 8.00(1.88)  | 9.26(5.38)   | 1.00(0.10)    | 1.32(0.33)  |
| Grace           | 4.68(1.54)  | 0.24(0.43)  | 1.34(0.04)    | 4.36(1.26)  | 2.82(3.04)   | 0.99(0.04)    | 2.71(0.75)  |
| GEL             | 16.14(2.14) | 5.18(4.72)  | 0.73(0.20)    | 11.24(1.86) | 52.62(56.06) | 1.38(0.84)    | 1.21(0.42)  |
| S3              |             |             |               |             |              |               |             |
| proposed        | 17.24(0.87) | 0.59(0.80)  | 0.59(0.09)    | 14.41(1.67) | 2.65(1.98)   | 0.56(0.11)    | 0.59(0.15)  |
| triBayes        | 9.22(1.81)  | 1.38(1.88)  | 1.72(0.05)    | 0.14(0.99)  | 0.00(0.00)   | 1.03(0.02)    | 2.66(0.57)  |
| glinternet      | 12.86(1.97) | 3.14(2.30)  | 0.99(0.07)    | 7.64(2.05)  | 2.84(2.22)   | 0.88(0.05)    | 1.17(0.26)  |
| Lasso           | 7.56(1.66)  | 0.10(0.30)  | 1.12(0.10)    | 7.58(1.58)  | 12.34(5.19)  | 0.87(0.05)    | 1.23(0.30)  |
| iFORM           | 10.82(1.76) | 44.36(4.01) | 1.63(0.19)    | 3.16(1.61)  | 37.78(3.72)  | 1.50(0.13)    | 2.69(0.76)  |
| HierNet         | 10.22(1.52) | 0.72(0.95)  | 1.00(0.07)    | 5.78(1.80)  | 5.70(4.09)   | 0.93(0.05)    | 1.18(0.29)  |
| Grace           | 7.32(1.50)  | 0.28(0.50)  | 1.14(0.11)    | 9.98(1.41)  | 6.06(5.88)   | 1.04(0.07)    | 1.33(0.37)  |
| GEL             | 15.42(2.91) | 7.16(5.16)  | 0.88(0.15)    | 9.88(2.84)  | 78.68(63.44) | 1.77(0.85)    | 1.31(0.55)  |
| S4              |             |             |               |             |              |               |             |
| proposed        | 16.73(1.39) | 0.92(1.03)  | 0.53(0.09)    | 6.96(3.05)  | 12.98(3.19)  | 1.03(0.16)    | 0.71(0.21)  |
| triBayes        | 13.84(2.48) | 3.32(4.47)  | 1.53(0.22)    | 0.04(0.28)  | 1.72(2.74)   | 1.06(0.05)    | 3.23(1.35)  |
| glinternet      | 15.64(1.90) | 3.20(2.79)  | 0.72(0.10)    | 6.42(2.42)  | 7.40(2.85)   | 1.02(0.07)    | 1.09(0.25)  |
| Lasso           | 8.54(1.79)  | 0.08(0.27)  | 0.98(0.07)    | 5.60(2.46)  | 13.80(5.64)  | 1.05(0.09)    | 1.23(0.32)  |
| iFORM           | 8.80(1.80)  | 46.26(3.24) | 2.04(0.29)    | 0.70(1.05)  | 41.16(2.90)  | 1.83(0.14)    | 3.75(1.17)  |
| HierNet         | 12.64(2.73) | 0.72(0.86)  | 0.86(0.12)    | 5.74(2.11)  | 8.34(4.09)   | 1.37(0.17)    | 1.15(0.28)  |
| Grace           | 8.30(2.35)  | 0.46(0.65)  | 1.01(0.07)    | 2.90(2.15)  | 12.70(8.77)  | 1.25(0.08)    | 1.45(0.36)  |
| GEL             | 16.64(1.41) | 2.82(2.46)  | 0.62(0.14)    | 10.26(1.40) | 17.02(25.53) | 0.89(0.39)    | 0.89(0.30)  |



Table S7: Simulation results under the scenarios with  $\rho = 0.6$ ,  $K = 50$ , and  $r = 1/\sqrt{5}$ . In each cell, mean (SD) based on 100 replicates.

| <b>Approach</b> | <b>M:TP</b> | <b>M:FP</b>  | <b>M:RSSE</b> | <b>I:TP</b> | <b>I:FP</b>    | <b>I:RSSE</b> | <b>PMSE</b>  |
|-----------------|-------------|--------------|---------------|-------------|----------------|---------------|--------------|
| S1              |             |              |               |             |                |               |              |
| proposed        | 17.76(0.43) | 2.89(1.72)   | 0.49(0.10)    | 16.73(0.50) | 5.76(2.89)     | 0.46(0.11)    | 0.57(0.12)   |
| triBayes        | 17.28(1.11) | 28.18(5.68)  | 1.51(0.07)    | 7.94(1.36)  | 11.22(2.43)    | 1.33(0.07)    | 2.41(0.61)   |
| glinternet      | 17.90(0.30) | 9.30(4.00)   | 0.88(0.11)    | 15.70(0.99) | 11.52(4.00)    | 0.89(0.11)    | 1.24(0.30)   |
| Lasso           | 5.66(1.61)  | 0.14(0.40)   | 1.58(0.06)    | 9.40(1.95)  | 11.04(4.41)    | 1.36(0.14)    | 2.84(0.66)   |
| iFORM           | 15.24(2.21) | 38.10(4.06)  | 1.64(0.36)    | 8.04(2.95)  | 34.62(3.65)    | 1.71(0.27)    | 3.55(1.76)   |
| HierNet         | 15.18(2.66) | 2.40(2.04)   | 1.27(0.21)    | 8.00(2.31)  | 11.22(5.67)    | 1.45(0.14)    | 3.21(1.02)   |
| Grace           | 8.92(2.90)  | 1.64(1.63)   | 1.58(0.19)    | 11.44(1.75) | 9.90(7.25)     | 1.61(0.13)    | 2.76(0.84)   |
| GEL             | 12.00(1.12) | 26.82(5.46)  | 4.15(1.26)    | 8.26(1.80)  | 357.26(70.10)  | 15.05(4.62)   | 39.11(25.71) |
| S2              |             |              |               |             |                |               |              |
| proposed        | 16.94(0.89) | 1.73(1.57)   | 0.53(0.14)    | 16.88(0.32) | 5.65(2.83)     | 0.45(0.10)    | 0.66(0.14)   |
| triBayes        | 17.86(0.40) | 25.76(4.61)  | 1.42(0.08)    | 7.98(1.39)  | 3.82(2.30)     | 1.34(0.06)    | 2.16(0.62)   |
| glinternet      | 17.84(0.42) | 8.54(3.69)   | 0.87(0.11)    | 15.72(1.09) | 10.50(3.78)    | 0.87(0.10)    | 1.07(0.30)   |
| Lasso           | 11.76(2.83) | 0.80(0.90)   | 1.37(0.16)    | 12.76(1.92) | 32.12(47.66)   | 1.20(0.12)    | 1.99(0.75)   |
| iFORM           | 14.66(2.34) | 38.70(4.07)  | 1.71(0.36)    | 8.82(2.77)  | 33.46(3.19)    | 1.76(0.26)    | 2.91(1.06)   |
| HierNet         | 15.94(1.52) | 2.38(1.84)   | 1.20(0.19)    | 9.42(1.76)  | 13.34(5.21)    | 1.45(0.13)    | 2.02(0.51)   |
| Grace           | 5.12(1.41)  | 0.48(0.71)   | 1.78(0.08)    | 5.14(1.28)  | 4.72(4.01)     | 1.51(0.06)    | 4.30(1.56)   |
| GEL             | 11.48(1.67) | 25.48(7.33)  | 3.74(1.19)    | 8.92(1.94)  | 337.92(98.12)  | 12.85(4.33)   | 28.55(13.46) |
| S3              |             |              |               |             |                |               |              |
| proposed        | 17.40(0.87) | 1.85(1.96)   | 0.76(0.10)    | 15.27(1.78) | 6.08(3.11)     | 0.79(0.18)    | 0.69(0.19)   |
| triBayes        | 13.12(2.56) | 16.14(5.26)  | 1.73(0.29)    | 4.86(2.16)  | 3.70(2.10)     | 1.44(0.22)    | 2.35(1.05)   |
| glinternet      | 13.96(1.59) | 5.18(3.01)   | 1.37(0.11)    | 8.44(1.91)  | 5.98(3.42)     | 1.35(0.08)    | 1.94(0.57)   |
| Lasso           | 7.98(2.09)  | 0.40(0.61)   | 1.65(0.11)    | 8.20(1.69)  | 15.64(6.53)    | 1.35(0.08)    | 2.02(0.61)   |
| iFORM           | 14.12(2.68) | 39.72(4.66)  | 1.81(0.44)    | 6.26(3.47)  | 35.92(3.72)    | 1.87(0.28)    | 3.30(1.52)   |
| HierNet         | 11.18(1.83) | 1.88(1.33)   | 1.42(0.12)    | 5.62(1.89)  | 7.82(4.58)     | 1.46(0.07)    | 2.11(0.72)   |
| Grace           | 8.14(1.85)  | 1.24(1.19)   | 1.63(0.12)    | 11.08(1.43) | 12.38(7.87)    | 1.69(0.13)    | 2.11(0.47)   |
| GEL             | 10.84(3.16) | 23.42(10.74) | 2.75(0.85)    | 6.26(2.28)  | 307.46(149.32) | 8.74(4.04)    | 15.47(11.49) |
| S4              |             |              |               |             |                |               |              |
| proposed        | 17.37(0.86) | 2.52(1.82)   | 0.57(0.11)    | 9.85(2.48)  | 17.60(3.54)    | 1.33(0.20)    | 0.92(0.27)   |
| triBayes        | 17.58(0.84) | 28.44(4.95)  | 1.50(0.06)    | 0.28(0.57)  | 9.70(2.22)     | 1.74(0.04)    | 2.37(0.55)   |
| glinternet      | 17.40(1.25) | 8.04(3.95)   | 0.90(0.19)    | 10.74(3.19) | 11.56(3.99)    | 1.47(0.17)    | 1.39(0.39)   |
| Lasso           | 10.68(2.86) | 0.42(0.70)   | 1.48(0.17)    | 7.90(3.10)  | 18.48(7.25)    | 1.59(0.17)    | 1.87(0.56)   |
| iFORM           | 10.38(3.08) | 43.18(4.42)  | 2.70(0.62)    | 1.82(2.63)  | 41.38(3.67)    | 2.53(0.30)    | 5.44(2.13)   |
| HierNet         | 14.88(2.65) | 2.52(1.89)   | 1.18(0.24)    | 8.16(2.57)  | 9.58(3.89)     | 1.90(0.20)    | 1.64(0.49)   |
| Grace           | 8.74(2.13)  | 1.16(0.96)   | 1.60(0.10)    | 2.78(2.05)  | 14.18(6.47)    | 2.02(0.11)    | 2.44(0.61)   |
| GEL             | 12.02(0.14) | 27.96(0.20)  | 3.99(0.88)    | 7.80(1.32)  | 371.96(2.18)   | 13.91(2.58)   | 33.54(16.15) |

Table S8: Simulation results under the scenarios with  $\rho = 0.6$ ,  $K = 50$ , and  $r = 1/\sqrt{12}$ . In each cell, mean (SD) based on 100 replicates.

| <b>Approach</b> | <b>M:TP</b> | <b>M:FP</b> | <b>M:RSSE</b> | <b>I:TP</b> | <b>I:FP</b>    | <b>I:RSSE</b> | <b>PMSE</b>  |
|-----------------|-------------|-------------|---------------|-------------|----------------|---------------|--------------|
| S1              |             |             |               |             |                |               |              |
| proposed        | 16.54(1.16) | 1.34(1.33)  | 0.55(0.09)    | 15.08(1.52) | 2.28(1.98)     | 0.44(0.13)    | 0.60(0.14)   |
| triBayes        | 17.28(1.03) | 23.82(4.87) | 1.35(0.05)    | 6.36(1.14)  | 4.80(1.43)     | 0.88(0.04)    | 1.47(0.31)   |
| glinetnet       | 17.04(1.09) | 7.66(3.19)  | 0.67(0.09)    | 13.52(1.66) | 8.60(3.53)     | 0.71(0.07)    | 1.04(0.26)   |
| Lasso           | 5.86(1.53)  | 0.32(0.74)  | 1.01(0.05)    | 8.96(1.85)  | 13.98(5.19)    | 0.89(0.09)    | 1.47(0.35)   |
| iFORM           | 10.78(2.13) | 44.02(2.69) | 1.70(0.21)    | 3.94(1.39)  | 37.24(2.95)    | 1.47(0.10)    | 3.18(0.83)   |
| HierNet         | 12.58(2.94) | 1.74(1.37)  | 0.90(0.11)    | 6.84(1.96)  | 9.84(5.69)     | 0.99(0.09)    | 1.76(0.56)   |
| Grace           | 7.12(2.21)  | 1.46(1.27)  | 1.04(0.10)    | 10.28(1.67) | 8.94(5.44)     | 1.04(0.09)    | 1.63(0.38)   |
| GEL             | 12.02(0.71) | 26.92(5.35) | 3.06(0.83)    | 8.20(1.54)  | 357.86(68.66)  | 11.06(3.63)   | 21.03(12.65) |
| S2              |             |             |               |             |                |               |              |
| proposed        | 15.82(1.17) | 0.88(1.48)  | 0.55(0.08)    | 16.08(1.18) | 2.26(1.69)     | 0.38(0.12)    | 0.59(0.16)   |
| triBayes        | 17.86(0.35) | 21.96(4.31) | 1.28(0.05)    | 5.80(1.76)  | 0.52(0.65)     | 0.90(0.05)    | 1.36(0.41)   |
| glinetnet       | 16.78(1.11) | 7.36(3.12)  | 0.63(0.07)    | 14.18(1.19) | 7.64(3.24)     | 0.69(0.05)    | 0.91(0.22)   |
| Lasso           | 8.24(2.44)  | 0.62(0.83)  | 0.95(0.07)    | 9.78(2.26)  | 31.14(65.03)   | 0.89(0.08)    | 1.41(0.46)   |
| iFORM           | 10.50(2.53) | 44.44(3.73) | 1.74(0.24)    | 4.52(1.96)  | 36.62(3.53)    | 1.48(0.13)    | 2.58(0.74)   |
| HierNet         | 11.98(2.93) | 1.64(1.86)  | 0.88(0.11)    | 7.68(2.33)  | 9.36(5.59)     | 0.98(0.10)    | 1.30(0.37)   |
| Grace           | 4.38(1.41)  | 0.56(0.76)  | 1.34(0.04)    | 4.52(1.27)  | 4.14(3.18)     | 0.99(0.04)    | 2.59(0.77)   |
| GEL             | 11.90(1.07) | 27.62(2.16) | 2.85(0.63)    | 9.24(1.45)  | 367.82(28.47)  | 10.51(2.27)   | 17.78(9.47)  |
| S3              |             |             |               |             |                |               |              |
| proposed        | 16.35(1.53) | 1.52(1.64)  | 0.72(0.09)    | 12.92(2.56) | 2.69(1.86)     | 0.63(0.11)    | 0.66(0.20)   |
| triBayes        | 12.32(3.58) | 10.44(8.30) | 1.58(0.14)    | 2.76(2.49)  | 0.46(0.93)     | 0.97(0.06)    | 1.83(0.81)   |
| glinetnet       | 11.78(2.42) | 4.92(2.91)  | 1.03(0.09)    | 6.46(2.13)  | 4.52(3.03)     | 0.91(0.05)    | 1.24(0.36)   |
| Lasso           | 6.72(2.07)  | 0.46(0.73)  | 1.14(0.10)    | 6.90(1.49)  | 15.72(5.21)    | 0.92(0.05)    | 1.27(0.34)   |
| iFORM           | 11.48(2.11) | 43.56(3.27) | 1.64(0.18)    | 4.02(1.73)  | 36.56(3.28)    | 1.43(0.13)    | 2.51(0.79)   |
| HierNet         | 9.22(2.22)  | 1.46(1.28)  | 1.04(0.09)    | 4.88(1.96)  | 6.50(3.87)     | 0.96(0.04)    | 1.26(0.38)   |
| Grace           | 6.90(1.42)  | 1.44(1.20)  | 1.16(0.11)    | 9.90(1.22)  | 10.14(8.05)    | 1.06(0.09)    | 1.31(0.31)   |
| GEL             | 11.64(1.72) | 25.40(8.49) | 2.22(0.70)    | 6.68(1.50)  | 333.34(122.33) | 7.27(2.79)    | 9.85(5.97)   |
| S4              |             |             |               |             |                |               |              |
| proposed        | 15.02(2.21) | 0.79(1.35)  | 0.63(0.11)    | 4.65(2.76)  | 10.75(3.07)    | 1.15(0.16)    | 0.86(0.19)   |
| triBayes        | 17.68(0.62) | 24.12(4.30) | 1.34(0.04)    | 0.00(0.00)  | 5.14(1.46)     | 1.14(0.03)    | 1.41(0.34)   |
| glinetnet       | 15.02(1.95) | 5.70(3.49)  | 0.74(0.12)    | 5.84(2.52)  | 8.58(3.15)     | 1.04(0.08)    | 1.13(0.28)   |
| Lasso           | 8.20(2.33)  | 0.46(0.76)  | 0.99(0.09)    | 5.48(2.34)  | 15.06(4.86)    | 1.07(0.08)    | 1.29(0.35)   |
| iFORM           | 8.18(2.34)  | 47.06(3.44) | 2.20(0.32)    | 0.38(0.75)  | 41.08(2.57)    | 1.84(0.13)    | 3.71(1.09)   |
| HierNet         | 12.22(3.07) | 1.96(1.67)  | 0.87(0.12)    | 5.00(2.39)  | 8.52(3.42)     | 1.41(0.14)    | 1.18(0.31)   |
| Grace           | 7.02(1.91)  | 1.12(1.06)  | 1.02(0.06)    | 1.94(1.62)  | 12.12(6.70)    | 1.27(0.08)    | 1.58(0.41)   |
| GEL             | 12.00(0.00) | 28.00(0.00) | 3.19(0.71)    | 7.90(1.39)  | 372.10(1.39)   | 11.53(2.54)   | 23.31(13.88) |

Table S9: Simulation results under the scenarios with  $\rho = 0.4$ ,  $K = 100$ , and  $r = 1/\sqrt{5}$ , where some genetic factors are involved in multiple networks. In each cell, mean (SD) based on 100 replicates.

| <b>Approach</b> | <b>M:TP</b> | <b>M:FP</b> | <b>M:RSSE</b> | <b>I:TP</b> | <b>I:FP</b>   | <b>I:RSSE</b> | <b>PMSE</b> |
|-----------------|-------------|-------------|---------------|-------------|---------------|---------------|-------------|
| S1              |             |             |               |             |               |               |             |
| proposed        | 17.82(0.39) | 2.02(1.35)  | 0.37(0.11)    | 16.60(0.57) | 9.14(4.05)    | 0.49(0.10)    | 0.59(0.14)  |
| triBayes        | 16.30(1.26) | 8.95(1.79)  | 1.32(0.40)    | 5.50(3.35)  | 2.75(2.15)    | 1.36(0.15)    | 2.50(1.21)  |
| glnet           | 17.60(0.68) | 5.55(2.98)  | 0.92(0.12)    | 14.70(1.53) | 4.35(2.21)    | 1.01(0.13)    | 1.43(0.43)  |
| Lasso           | 8.20(3.17)  | 0.00(0.00)  | 1.48(0.12)    | 11.50(1.96) | 15.60(7.58)   | 1.19(0.11)    | 2.29(0.62)  |
| iFORM           | 16.90(1.59) | 36.35(3.57) | 1.30(0.30)    | 13.20(3.58) | 30.40(3.55)   | 1.29(0.33)    | 2.18(1.81)  |
| HierNet         | 14.35(2.37) | 1.20(1.77)  | 1.19(0.17)    | 9.05(2.91)  | 9.05(7.10)    | 1.31(0.14)    | 2.18(0.78)  |
| Grace           | 9.90(2.34)  | 0.35(0.93)  | 1.45(0.14)    | 12.00(1.72) | 8.55(8.53)    | 1.20(0.11)    | 2.14(0.57)  |
| GEL             | 18.00(0.00) | 10.90(3.39) | 0.72(0.13)    | 13.15(0.88) | 123.45(37.83) | 2.06(0.42)    | 1.96(0.96)  |
| S2              |             |             |               |             |               |               |             |
| proposed        | 16.98(1.10) | 1.48(1.20)  | 0.46(0.17)    | 16.12(1.00) | 7.44(3.70)    | 0.57(0.14)    | 0.68(0.17)  |
| triBayes        | 16.00(1.34) | 4.05(3.20)  | 1.81(0.25)    | 0.75(2.31)  | 0.15(0.49)    | 1.63(0.10)    | 4.33(1.06)  |
| glnet           | 17.65(0.81) | 5.05(3.43)  | 0.96(0.12)    | 14.55(1.64) | 4.25(2.75)    | 1.07(0.10)    | 1.36(0.51)  |
| Lasso           | 6.20(2.50)  | 0.15(0.37)  | 1.50(0.07)    | 7.65(2.78)  | 49.35(106.84) | 1.47(0.07)    | 2.66(0.65)  |
| iFORM           | 15.55(2.70) | 38.70(4.54) | 1.53(0.44)    | 11.45(4.63) | 31.60(4.48)   | 1.49(0.45)    | 2.47(1.23)  |
| HierNet         | 13.00(4.13) | 1.15(1.27)  | 1.27(0.20)    | 9.05(2.80)  | 8.75(6.37)    | 1.38(0.13)    | 1.92(0.69)  |
| Grace           | 5.40(1.39)  | 0.25(0.55)  | 1.75(0.05)    | 4.75(1.41)  | 6.75(5.18)    | 1.51(0.05)    | 3.36(1.03)  |
| GEL             | 18.00(0.00) | 11.20(2.48) | 0.72(0.12)    | 13.20(0.62) | 124.70(37.91) | 2.05(0.41)    | 1.68(0.43)  |
| S3              |             |             |               |             |               |               |             |
| proposed        | 17.58(0.73) | 1.30(1.22)  | 0.61(0.09)    | 14.16(1.36) | 8.78(3.58)    | 0.84(0.11)    | 0.71(0.15)  |
| triBayes        | 12.25(3.06) | 4.30(2.41)  | 1.94(0.46)    | 0.00(0.00)  | 0.00(0.00)    | 1.52(0.36)    | 3.30(1.11)  |
| glnet           | 13.70(2.25) | 3.25(2.83)  | 1.36(0.16)    | 7.25(2.59)  | 2.00(1.78)    | 1.38(0.11)    | 1.96(0.51)  |
| Lasso           | 6.75(1.89)  | 0.05(0.22)  | 1.73(0.11)    | 7.50(1.64)  | 7.30(3.81)    | 1.36(0.08)    | 2.28(0.62)  |
| iFORM           | 16.85(1.60) | 37.10(4.17) | 1.34(0.28)    | 11.50(3.75) | 31.70(3.01)   | 1.39(0.31)    | 2.05(0.80)  |
| HierNet         | 10.65(1.93) | 0.95(0.89)  | 1.46(0.13)    | 5.50(1.91)  | 6.25(3.39)    | 1.44(0.08)    | 2.07(0.68)  |
| Grace           | 9.20(1.36)  | 0.15(0.37)  | 1.54(0.11)    | 9.50(1.28)  | 11.90(10.48)  | 1.29(0.08)    | 1.93(0.51)  |
| GEL             | 17.70(0.98) | 11.45(4.07) | 0.79(0.16)    | 12.35(0.99) | 127.90(40.54) | 2.11(0.39)    | 1.88(0.67)  |
| S4              |             |             |               |             |               |               |             |
| proposed        | 17.88(0.39) | 2.14(1.26)  | 0.38(0.09)    | 12.76(2.07) | 15.18(3.54)   | 1.00(0.17)    | 0.78(0.19)  |
| triBayes        | 15.90(1.41) | 2.25(1.86)  | 1.95(0.03)    | 0.00(0.00)  | 0.00(0.00)    | 1.60(0.00)    | 4.52(1.47)  |
| glnet           | 15.95(2.72) | 5.10(3.60)  | 1.02(0.18)    | 8.25(3.32)  | 4.90(2.75)    | 1.42(0.08)    | 1.78(0.62)  |
| Lasso           | 6.70(1.89)  | 0.00(0.00)  | 1.53(0.08)    | 3.85(2.37)  | 8.55(6.33)    | 1.54(0.07)    | 2.77(0.99)  |
| iFORM           | 13.10(3.78) | 42.80(6.44) | 2.07(0.70)    | 5.25(5.66)  | 37.20(4.03)   | 2.04(0.50)    | 4.44(2.51)  |
| HierNet         | 13.30(3.34) | 1.00(1.38)  | 1.21(0.16)    | 6.10(2.86)  | 9.10(5.63)    | 1.62(0.10)    | 1.94(0.53)  |
| Grace           | 10.00(2.27) | 0.10(0.31)  | 1.44(0.11)    | 4.85(2.39)  | 11.80(7.51)   | 1.59(0.07)    | 2.25(0.81)  |
| GEL             | 17.90(0.45) | 10.25(3.65) | 0.71(0.14)    | 12.65(1.69) | 112.30(50.97) | 1.96(0.49)    | 1.73(0.64)  |

Table S10: Simulation results under the scenarios with  $\rho = 0.4$ ,  $K = 100$ , and  $r = 1/\sqrt{12}$ , where some genetic factors are involved in multiple networks. In each cell, mean (SD) based on 100 replicates.

| Approach   | M:TP        | M:FP        | M:RSSE     | I:TP        | I:FP          | I:RSSE     | PMSE       |
|------------|-------------|-------------|------------|-------------|---------------|------------|------------|
| S1         |             |             |            |             |               |            |            |
| proposed   | 17.00(0.97) | 1.00(1.12)  | 0.43(0.08) | 15.32(1.19) | 4.48(2.99)    | 0.43(0.10) | 0.59(0.15) |
| triBayes   | 13.40(2.01) | 2.45(2.42)  | 1.61(0.22) | 0.65(2.01)  | 0.30(0.92)    | 1.01(0.05) | 2.72(0.91) |
| glinternet | 15.70(2.94) | 4.30(3.11)  | 0.72(0.09) | 11.70(2.74) | 2.55(1.70)    | 0.77(0.08) | 1.12(0.31) |
| Lasso      | 5.90(2.05)  | 0.00(0.00)  | 1.02(0.07) | 9.25(2.24)  | 12.55(6.04)   | 0.83(0.07) | 1.42(0.37) |
| iFORM      | 11.60(2.28) | 45.05(2.61) | 1.56(0.19) | 5.30(2.11)  | 34.55(3.69)   | 1.38(0.13) | 2.57(0.94) |
| HierNet    | 10.60(2.84) | 0.40(0.50)  | 0.91(0.08) | 5.80(2.14)  | 4.80(3.52)    | 0.93(0.06) | 1.42(0.33) |
| Grace      | 6.85(1.09)  | 0.10(0.31)  | 1.01(0.04) | 10.10(1.68) | 6.15(4.66)    | 0.82(0.06) | 1.44(0.43) |
| GEL        | 17.75(0.64) | 9.50(4.52)  | 0.68(0.12) | 12.30(1.26) | 105.70(56.25) | 1.68(0.56) | 1.50(0.58) |
| S2         |             |             |            |             |               |            |            |
| proposed   | 16.04(1.58) | 0.88(0.80)  | 0.45(0.10) | 14.12(1.60) | 3.32(2.14)    | 0.53(0.12) | 0.65(0.18) |
| triBayes   | 12.35(1.53) | 0.40(0.60)  | 1.62(0.02) | 0.00(0.00)  | 0.00(0.00)    | 1.07(0.00) | 2.99(0.63) |
| glinternet | 14.45(3.86) | 3.10(2.55)  | 0.75(0.13) | 10.60(3.79) | 2.55(2.24)    | 0.83(0.10) | 1.10(0.42) |
| Lasso      | 4.90(1.68)  | 0.15(0.37)  | 0.99(0.06) | 5.25(2.24)  | 47.75(106.05) | 1.00(0.06) | 1.53(0.37) |
| iFORM      | 11.15(2.58) | 43.95(5.12) | 1.64(0.27) | 4.60(2.06)  | 37.35(4.08)   | 1.46(0.14) | 2.63(0.95) |
| HierNet    | 8.25(2.47)  | 0.20(0.52)  | 0.94(0.05) | 5.30(2.05)  | 3.75(2.02)    | 0.98(0.06) | 1.36(0.39) |
| Grace      | 4.05(1.10)  | 0.20(0.52)  | 1.35(0.04) | 3.45(1.39)  | 4.85(4.97)    | 1.00(0.03) | 2.18(0.65) |
| GEL        | 17.50(1.28) | 10.25(4.28) | 0.70(0.10) | 12.50(1.32) | 119.20(47.25) | 1.81(0.49) | 1.62(0.55) |
| S3         |             |             |            |             |               |            |            |
| proposed   | 15.96(1.46) | 1.18(1.40)  | 0.61(0.08) | 11.32(1.77) | 5.00(3.55)    | 0.70(0.08) | 0.68(0.16) |
| triBayes   | 10.80(1.28) | 0.75(0.64)  | 1.72(0.02) | 0.00(0.00)  | 0.00(0.00)    | 1.03(0.00) | 2.18(0.50) |
| glinternet | 10.50(2.50) | 1.70(1.81)  | 1.01(0.08) | 4.55(2.61)  | 0.85(1.42)    | 0.95(0.06) | 1.28(0.27) |
| Lasso      | 5.20(1.58)  | 0.00(0.00)  | 1.21(0.08) | 5.55(1.61)  | 6.20(3.87)    | 0.92(0.05) | 1.41(0.42) |
| iFORM      | 11.85(2.37) | 45.00(4.28) | 1.53(0.18) | 3.95(2.54)  | 36.60(3.59)   | 1.39(0.10) | 2.31(0.71) |
| HierNet    | 8.80(1.94)  | 0.70(0.92)  | 1.05(0.08) | 4.30(2.27)  | 5.65(4.00)    | 0.96(0.06) | 1.30(0.35) |
| Grace      | 7.40(1.50)  | 0.10(0.31)  | 1.14(0.08) | 7.95(1.32)  | 8.65(8.51)    | 0.87(0.04) | 1.25(0.37) |
| GEL        | 17.40(1.96) | 10.85(3.54) | 0.71(0.11) | 11.65(1.76) | 126.15(40.81) | 1.84(0.37) | 1.52(0.48) |
| S4         |             |             |            |             |               |            |            |
| proposed   | 16.74(1.31) | 1.14(1.18)  | 0.46(0.09) | 8.56(2.33)  | 9.26(2.82)    | 0.86(0.12) | 0.77(0.17) |
| triBayes   | 13.75(1.68) | 0.45(0.60)  | 1.67(0.02) | 0.00(0.00)  | 0.00(0.00)    | 1.03(0.00) | 3.13(1.02) |
| glinternet | 12.11(2.49) | 1.26(1.88)  | 0.84(0.09) | 3.42(1.84)  | 2.58(2.09)    | 0.99(0.03) | 1.18(0.14) |
| Lasso      | 5.26(1.41)  | 0.00(0.00)  | 1.01(0.05) | 2.37(1.57)  | 5.84(3.25)    | 1.01(0.03) | 1.43(0.21) |
| iFORM      | 9.84(1.68)  | 48.05(3.08) | 1.88(0.15) | 1.16(1.12)  | 38.58(3.17)   | 1.63(0.12) | 3.05(0.92) |
| HierNet    | 8.68(2.00)  | 0.32(0.58)  | 0.93(0.08) | 2.74(1.66)  | 5.74(4.16)    | 1.08(0.07) | 1.31(0.27) |
| Grace      | 7.16(2.43)  | 0.21(0.71)  | 0.99(0.08) | 2.89(2.47)  | 7.95(10.37)   | 1.04(0.03) | 1.45(0.28) |
| GEL        | 15.79(2.70) | 4.95(5.58)  | 0.74(0.14) | 10.05(2.74) | 55.68(65.32)  | 1.26(0.60) | 1.29(0.44) |

Table S11: Simulation results under the scenarios with  $\rho = 0.6, K = 100$ , and  $r = 1/\sqrt{5}$ , where some genetic factors are involved in multiple networks. In each cell, mean (SD) based on 100 replicates.

| <b>Approach</b> | <b>M:TP</b> | <b>M:FP</b> | <b>M:RSSE</b> | <b>I:TP</b> | <b>I:FP</b>  | <b>I:RSSE</b> | <b>PMSE</b> |
|-----------------|-------------|-------------|---------------|-------------|--------------|---------------|-------------|
| S1              |             |             |               |             |              |               |             |
| proposed        | 17.90(0.30) | 3.72(1.63)  | 0.43(0.08)    | 16.16(1.08) | 12.74(5.64)  | 0.57(0.16)    | 0.61(0.15)  |
| triBayes        | 17.45(0.89) | 12.85(2.21) | 1.22(0.08)    | 7.80(1.54)  | 4.80(1.06)   | 1.28(0.07)    | 2.30(0.63)  |
| glninternet     | 18.00(0.00) | 7.50(4.50)  | 0.81(0.12)    | 16.10(0.91) | 8.40(4.57)   | 0.82(0.11)    | 1.11(0.33)  |
| Lasso           | 5.80(1.11)  | 0.05(0.22)  | 1.58(0.06)    | 10.90(1.59) | 6.85(3.54)   | 1.23(0.09)    | 2.70(0.68)  |
| iFORM           | 15.40(2.09) | 39.20(4.27) | 1.56(0.34)    | 8.75(3.11)  | 32.85(3.60)  | 1.66(0.27)    | 3.05(1.37)  |
| HierNet         | 16.45(1.67) | 2.25(1.74)  | 1.13(0.20)    | 9.60(2.52)  | 11.00(4.26)  | 1.37(0.15)    | 2.89(1.25)  |
| Grace           | 9.95(3.10)  | 1.00(2.13)  | 1.50(0.24)    | 11.20(1.82) | 5.85(4.70)   | 1.54(0.16)    | 2.67(0.96)  |
| GEL             | 17.90(0.31) | 3.75(2.81)  | 0.65(0.14)    | 12.30(1.08) | 25.95(26.68) | 1.23(0.40)    | 1.14(0.39)  |
| S2              |             |             |               |             |              |               |             |
| proposed        | 17.34(0.77) | 2.88(1.55)  | 0.46(0.11)    | 16.14(1.05) | 10.28(4.78)  | 0.57(0.15)    | 0.63(0.17)  |
| triBayes        | 17.30(1.42) | 10.00(2.13) | 1.21(0.24)    | 7.15(2.35)  | 2.80(1.77)   | 1.38(0.11)    | 2.60(1.48)  |
| glninternet     | 17.90(0.45) | 6.15(3.20)  | 0.87(0.13)    | 15.95(1.23) | 7.40(3.47)   | 0.86(0.11)    | 0.96(0.24)  |
| Lasso           | 12.85(2.11) | 0.35(0.59)  | 1.42(0.15)    | 13.45(1.73) | 57.25(93.46) | 1.15(0.11)    | 1.71(0.40)  |
| iFORM           | 14.30(2.85) | 38.70(4.74) | 1.75(0.55)    | 7.05(2.84)  | 35.60(3.02)  | 1.87(0.26)    | 2.94(1.56)  |
| HierNet         | 15.65(2.13) | 0.80(1.01)  | 1.27(0.19)    | 8.80(2.12)  | 9.45(3.97)   | 1.52(0.14)    | 1.88(0.57)  |
| Grace           | 5.30(1.38)  | 0.15(0.37)  | 1.81(0.06)    | 4.85(1.14)  | 2.55(2.26)   | 1.50(0.05)    | 4.07(1.31)  |
| GEL             | 17.70(0.92) | 5.00(4.39)  | 0.77(0.21)    | 12.70(0.80) | 48.45(51.33) | 1.62(0.99)    | 1.22(0.46)  |
| S3              |             |             |               |             |              |               |             |
| proposed        | 17.78(0.46) | 1.50(1.39)  | 0.69(0.10)    | 14.50(1.47) | 8.02(4.05)   | 0.84(0.14)    | 0.65(0.17)  |
| triBayes        | 13.30(2.08) | 10.50(3.33) | 1.84(0.23)    | 3.05(3.09)  | 1.50(1.79)   | 1.52(0.11)    | 3.10(1.16)  |
| glninternet     | 14.90(1.52) | 4.95(3.39)  | 1.30(0.10)    | 9.70(1.81)  | 5.60(2.50)   | 1.30(0.07)    | 1.72(0.41)  |
| Lasso           | 8.85(1.66)  | 0.15(0.37)  | 1.62(0.09)    | 8.90(1.48)  | 12.00(5.15)  | 1.28(0.08)    | 1.68(0.41)  |
| iFORM           | 14.20(3.21) | 38.95(5.05) | 1.77(0.52)    | 6.35(4.27)  | 36.15(3.25)  | 1.85(0.32)    | 3.25(1.65)  |
| HierNet         | 11.45(1.36) | 0.85(1.31)  | 1.39(0.12)    | 5.30(1.59)  | 6.50(4.37)   | 1.48(0.07)    | 2.08(0.63)  |
| Grace           | 8.60(1.43)  | 0.35(0.49)  | 1.59(0.11)    | 10.75(1.48) | 8.55(9.88)   | 1.67(0.12)    | 2.03(0.66)  |
| GEL             | 16.20(2.42) | 7.90(5.23)  | 0.97(0.22)    | 11.10(2.47) | 89.45(60.16) | 2.14(0.68)    | 1.56(0.50)  |
| S4              |             |             |               |             |              |               |             |
| proposed        | 17.92(0.34) | 3.08(1.90)  | 0.43(0.10)    | 11.90(2.54) | 19.26(4.96)  | 1.15(0.22)    | 0.75(0.19)  |
| triBayes        | 17.00(1.62) | 10.15(3.39) | 1.34(0.30)    | 0.70(1.49)  | 7.25(3.63)   | 1.69(0.09)    | 2.85(1.46)  |
| glninternet     | 17.70(0.66) | 6.30(3.40)  | 0.79(0.19)    | 12.00(2.41) | 9.85(3.77)   | 1.40(0.18)    | 1.38(0.46)  |
| Lasso           | 11.80(2.59) | 0.30(0.47)  | 1.41(0.15)    | 8.50(2.74)  | 17.10(7.18)  | 1.57(0.17)    | 1.92(0.59)  |
| iFORM           | 11.05(3.65) | 43.55(5.74) | 2.64(0.77)    | 2.55(4.02)  | 39.60(4.01)  | 2.48(0.42)    | 5.76(2.78)  |
| HierNet         | 16.00(1.97) | 1.55(1.23)  | 1.10(0.19)    | 9.15(2.30)  | 9.90(4.48)   | 1.86(0.15)    | 1.54(0.45)  |
| Grace           | 10.65(2.68) | 0.35(0.59)  | 1.51(0.13)    | 4.00(2.03)  | 13.05(6.49)  | 2.00(0.09)    | 2.15(0.43)  |
| GEL             | 17.80(0.52) | 3.70(2.54)  | 0.67(0.15)    | 11.55(0.76) | 21.05(27.94) | 1.23(0.44)    | 1.05(0.39)  |

Table S12: Simulation results under the scenarios with  $\rho = 0.6, K = 100$ , and  $r = 1/\sqrt{12}$ , where some genetic factors are involved in multiple networks. In each cell, mean (SD) based on 100 replicates.

| <b>Approach</b> | <b>M:TP</b> | <b>M:FP</b> | <b>M:RSSE</b> | <b>I:TP</b> | <b>I:FP</b>  | <b>I:RSSE</b> | <b>PMSE</b> |
|-----------------|-------------|-------------|---------------|-------------|--------------|---------------|-------------|
| S1              |             |             |               |             |              |               |             |
| proposed        | 17.22(0.74) | 1.50(1.20)  | 0.49(0.08)    | 14.48(1.37) | 4.44(3.56)   | 0.51(0.13)    | 0.56(0.14)  |
| triBayes        | 16.85(2.18) | 9.65(2.96)  | 1.21(0.20)    | 5.80(2.46)  | 2.80(1.47)   | 0.88(0.07)    | 1.72(1.15)  |
| glineternet     | 17.45(1.10) | 4.90(2.75)  | 0.61(0.07)    | 14.45(1.54) | 5.40(3.12)   | 0.65(0.06)    | 0.96(0.25)  |
| Lasso           | 6.60(1.50)  | 0.05(0.22)  | 1.00(0.06)    | 10.65(1.42) | 9.95(5.17)   | 0.79(0.07)    | 1.37(0.28)  |
| iFORM           | 11.40(2.21) | 43.35(3.91) | 1.67(0.20)    | 3.60(1.47)  | 37.75(3.45)  | 1.50(0.11)    | 3.20(0.92)  |
| HierNet         | 13.90(1.68) | 0.80(1.15)  | 0.86(0.12)    | 7.75(1.80)  | 6.65(3.27)   | 0.95(0.09)    | 1.69(0.48)  |
| Grace           | 8.45(2.58)  | 0.50(0.76)  | 0.99(0.10)    | 10.25(1.97) | 5.55(4.38)   | 1.00(0.10)    | 1.58(0.56)  |
| GEL             | 17.20(0.89) | 5.00(4.28)  | 0.64(0.14)    | 11.00(1.69) | 46.15(54.14) | 1.26(0.76)    | 1.10(0.40)  |
| S2              |             |             |               |             |              |               |             |
| proposed        | 16.28(1.34) | 0.90(0.79)  | 0.50(0.08)    | 14.14(1.46) | 2.42(1.95)   | 0.53(0.12)    | 0.59(0.16)  |
| triBayes        | 14.00(3.18) | 3.70(4.58)  | 1.43(0.25)    | 2.00(3.18)  | 0.40(0.68)   | 1.01(0.09)    | 2.85(1.19)  |
| glineternet     | 17.20(0.83) | 4.05(2.16)  | 0.62(0.08)    | 14.15(1.27) | 4.50(2.16)   | 0.69(0.06)    | 0.81(0.20)  |
| Lasso           | 8.20(2.75)  | 0.30(0.57)  | 0.99(0.08)    | 9.85(1.81)  | 37.45(82.22) | 0.87(0.07)    | 1.32(0.30)  |
| iFORM           | 10.60(2.85) | 43.80(4.34) | 1.69(0.24)    | 3.65(1.50)  | 37.60(3.52)  | 1.48(0.10)    | 2.41(0.78)  |
| HierNet         | 13.15(3.15) | 0.40(0.82)  | 0.90(0.11)    | 8.15(2.11)  | 9.00(4.92)   | 1.01(0.11)    | 1.22(0.33)  |
| Grace           | 4.60(1.70)  | 0.20(0.41)  | 1.35(0.06)    | 4.40(1.31)  | 2.35(2.37)   | 0.98(0.03)    | 2.44(0.62)  |
| GEL             | 16.35(1.79) | 4.05(4.43)  | 0.69(0.14)    | 11.20(1.91) | 41.25(49.40) | 1.23(0.83)    | 1.11(0.49)  |
| S3              |             |             |               |             |              |               |             |
| proposed        | 16.92(1.05) | 0.68(0.98)  | 0.63(0.10)    | 12.44(1.67) | 3.26(2.51)   | 0.65(0.09)    | 0.62(0.15)  |
| triBayes        | 9.05(1.57)  | 1.30(1.17)  | 1.72(0.02)    | 0.00(0.00)  | 0.00(0.00)   | 1.03(0.00)    | 2.44(0.48)  |
| glineternet     | 13.20(1.94) | 3.75(2.24)  | 0.99(0.08)    | 8.00(1.92)  | 3.25(2.10)   | 0.89(0.06)    | 1.18(0.29)  |
| Lasso           | 7.45(1.57)  | 0.15(0.37)  | 1.12(0.09)    | 7.85(1.46)  | 12.50(5.33)  | 0.87(0.05)    | 1.15(0.26)  |
| iFORM           | 11.35(1.46) | 43.30(3.54) | 1.57(0.15)    | 3.55(1.43)  | 37.55(3.73)  | 1.50(0.13)    | 2.63(0.73)  |
| HierNet         | 10.35(1.53) | 1.00(1.08)  | 1.00(0.07)    | 5.10(1.62)  | 6.45(3.82)   | 0.94(0.06)    | 1.19(0.31)  |
| Grace           | 7.50(1.28)  | 0.20(0.41)  | 1.14(0.09)    | 9.65(1.46)  | 6.80(6.99)   | 1.05(0.09)    | 1.23(0.39)  |
| GEL             | 16.05(2.82) | 8.55(4.87)  | 0.90(0.15)    | 10.55(2.31) | 95.20(60.42) | 2.03(0.87)    | 1.44(0.58)  |
| S4              |             |             |               |             |              |               |             |
| proposed        | 16.54(1.40) | 0.80(0.95)  | 0.52(0.10)    | 6.08(2.51)  | 11.64(2.66)  | 1.07(0.13)    | 0.77(0.18)  |
| triBayes        | 13.75(2.47) | 3.10(4.15)  | 1.54(0.22)    | 0.00(0.00)  | 1.70(2.90)   | 1.05(0.05)    | 3.29(1.44)  |
| glineternet     | 16.00(1.65) | 3.35(2.46)  | 0.70(0.11)    | 6.35(2.48)  | 6.80(3.11)   | 1.03(0.08)    | 1.14(0.33)  |
| Lasso           | 8.65(1.27)  | 0.15(0.37)  | 0.98(0.06)    | 5.20(2.12)  | 13.80(5.80)  | 1.06(0.10)    | 1.26(0.35)  |
| iFORM           | 8.85(1.73)  | 44.90(2.99) | 2.04(0.31)    | 0.70(0.86)  | 42.60(2.72)  | 1.87(0.14)    | 3.80(1.25)  |
| HierNet         | 12.85(3.03) | 0.75(0.79)  | 0.84(0.10)    | 5.60(2.33)  | 8.00(4.08)   | 1.37(0.15)    | 1.16(0.29)  |
| Grace           | 8.25(2.24)  | 0.45(0.51)  | 1.00(0.05)    | 2.55(1.39)  | 11.10(5.75)  | 1.26(0.07)    | 1.42(0.34)  |
| GEL             | 17.00(1.17) | 3.20(2.75)  | 0.58(0.12)    | 10.75(1.16) | 18.35(28.39) | 0.90(0.45)    | 0.84(0.31)  |

Table S13: Simulation results under the scenarios with  $n = 300, \rho = 0.4, K = 100, r = 1/\sqrt{5}$ , coefficient type S1, and various values of  $p$ . In each cell, mean (SD) based on 100 replicates. Note that since HierNet is not applicable when the dimension of predictors is too high, results are not available for  $p = 1200$  and  $1400$ .

| Approach   | M:TP        | M:FP        | M:RSSE     | I:TP        | I:FP          | I:RSSE     | PMSE       |
|------------|-------------|-------------|------------|-------------|---------------|------------|------------|
| $p = 800$  |             |             |            |             |               |            |            |
| proposed   | 18.00(0.00) | 2.50(1.17)  | 1.85(0.02) | 16.90(0.31) | 10.37(3.78)   | 0.45(0.10) | 0.56(0.14) |
| triBayes   | 15.63(1.71) | 9.23(2.69)  | 2.10(0.17) | 0.00(0.00)  | 9.07(5.51)    | 0.78(0.44) | 2.27(1.04) |
| glinetnet  | 16.53(1.14) | 6.83(3.67)  | 2.04(0.08) | 0.00(0.00)  | 20.07(4.78)   | 0.90(0.14) | 1.51(0.51) |
| Lasso      | 13.60(2.37) | 1.17(0.87)  | 2.17(0.09) | 0.00(0.00)  | 274.03(68.84) | 1.26(0.10) | 1.99(0.51) |
| iFORM      | 15.97(2.04) | 35.77(4.02) | 2.36(0.25) | 0.00(0.00)  | 44.30(2.45)   | 1.88(0.19) | 2.29(1.15) |
| HierNet    | 13.77(2.86) | 2.00(1.76)  | 2.16(0.11) | 0.00(0.00)  | 20.03(8.63)   | 1.01(0.25) | 2.21(0.56) |
| Grace      | 8.97(3.00)  | 0.33(0.71)  | 2.28(0.07) | 11.90(2.14) | 7.40(8.33)    | 1.23(0.11) | 2.25(0.62) |
| GEL        | 17.87(0.73) | 10.03(4.09) | 2.02(0.09) | 13.00(1.02) | 112.77(48.19) | 1.96(0.51) | 1.79(0.65) |
| $p = 1200$ |             |             |            |             |               |            |            |
| proposed   | 17.90(0.31) | 2.33(1.21)  | 1.85(0.02) | 16.93(0.25) | 9.43(4.11)    | 0.45(0.08) | 0.60(0.13) |
| triBayes   | 15.77(1.14) | 9.80(2.61)  | 2.23(0.23) | 0.00(0.00)  | 6.20(5.25)    | 0.51(0.43) | 3.24(1.68) |
| glinetnet  | 16.40(1.25) | 6.67(3.87)  | 2.07(0.07) | 0.00(0.00)  | 18.07(4.34)   | 0.82(0.14) | 1.64(0.55) |
| Lasso      | 12.53(2.10) | 1.20(0.85)  | 2.21(0.07) | 0.00(0.00)  | 296.87(10.75) | 1.24(0.10) | 2.16(0.71) |
| iFORM      | 15.50(2.13) | 40.87(3.70) | 2.40(0.24) | 0.00(0.00)  | 40.47(2.90)   | 1.76(0.17) | 2.75(1.78) |
| HierNet    | -           | -           | -          | -           | -             | -          | -          |
| Grace      | 10.10(3.17) | 0.57(1.25)  | 2.26(0.10) | 12.40(1.83) | 12.00(12.35)  | 1.21(0.13) | 2.30(0.78) |
| GEL        | 18.00(0.00) | 11.37(2.41) | 1.99(0.05) | 13.20(0.61) | 128.10(31.33) | 2.06(0.35) | 1.93(0.52) |
| $p = 1400$ |             |             |            |             |               |            |            |
| proposed   | 17.90(0.31) | 3.47(1.36)  | 1.85(0.02) | 16.73(0.52) | 11.73(3.55)   | 0.53(0.10) | 0.66(0.18) |
| triBayes   | 15.63(1.38) | 10.30(3.42) | 2.22(0.22) | 0.00(0.00)  | 6.87(5.13)    | 0.52(0.38) | 3.33(1.67) |
| glinetnet  | 16.17(2.07) | 6.10(3.49)  | 2.08(0.07) | 0.00(0.00)  | 18.53(4.76)   | 0.83(0.19) | 1.64(0.55) |
| Lasso      | 12.37(2.74) | 0.83(0.91)  | 2.22(0.07) | 0.00(0.00)  | 288.77(49.55) | 1.25(0.11) | 2.14(0.71) |
| iFORM      | 14.23(2.66) | 44.13(4.68) | 2.57(0.37) | 0.00(0.00)  | 38.53(3.34)   | 1.74(0.15) | 3.09(1.35) |
| HierNet    | -           | -           | -          | -           | -             | -          | -          |
| Grace      | 8.23(2.27)  | 0.13(0.35)  | 2.29(0.06) | 11.33(1.54) | 6.27(6.20)    | 1.22(0.13) | 2.56(0.76) |
| GEL        | 18.00(0.00) | 10.10(3.91) | 2.00(0.06) | 12.83(0.95) | 111.93(49.25) | 1.96(0.49) | 1.76(0.54) |

Table S14: Simulation results under the scenarios with  $n = 300, \rho = 0.4, K = 100, r = 1/\sqrt{5}$ , coefficient type S2, and various values of  $p$ . In each cell, mean (SD) based on 100 replicates. Note that since HierNet is not applicable when the dimension of predictors is too high, results are not available for  $p = 1200$  and  $1400$ .

| <b>Approach</b> | <b>M:TP</b> | <b>M:FP</b> | <b>M:RSSE</b> | <b>I:TP</b> | <b>I:FP</b>   | <b>I:RSSE</b> | <b>PMSE</b> |
|-----------------|-------------|-------------|---------------|-------------|---------------|---------------|-------------|
| $p = 800$       |             |             |               |             |               |               |             |
| proposed        | 17.70(0.47) | 1.17(0.99)  | 3.52(0.04)    | 16.67(0.66) | 7.17(2.68)    | 0.49(0.14)    | 0.58(0.15)  |
| triBayes        | 15.40(1.35) | 5.33(2.80)  | 2.77(0.19)    | 0.00(0.00)  | 1.83(3.95)    | 0.17(0.35)    | 3.45(1.14)  |
| glineternet     | 16.30(1.12) | 6.80(3.54)  | 3.36(0.10)    | 0.00(0.00)  | 19.47(5.20)   | 0.95(0.12)    | 1.40(0.48)  |
| Lasso           | 12.20(2.71) | 1.47(1.01)  | 3.29(0.11)    | 0.00(0.00)  | 292.93(52.37) | 1.20(0.10)    | 2.25(0.64)  |
| iFORM           | 15.03(2.76) | 36.90(3.88) | 3.88(0.20)    | 0.00(0.00)  | 44.67(2.86)   | 1.87(0.16)    | 2.49(1.29)  |
| HierNet         | 11.70(3.29) | 1.20(1.06)  | 3.29(0.16)    | 0.00(0.00)  | 14.40(6.90)   | 1.09(0.25)    | 2.14(0.70)  |
| Grace           | 5.40(1.81)  | 0.03(0.18)  | 2.77(0.11)    | 4.73(0.98)  | 4.87(5.02)    | 1.51(0.04)    | 3.31(0.70)  |
| GEL             | 17.77(1.28) | 11.47(2.45) | 3.66(0.16)    | 13.27(1.44) | 128.63(29.06) | 2.06(0.28)    | 1.88(0.35)  |
| $p = 1200$      |             |             |               |             |               |               |             |
| proposed        | 17.60(0.56) | 1.80(1.37)  | 3.49(0.05)    | 16.70(0.47) | 7.43(3.63)    | 0.52(0.11)    | 0.67(0.20)  |
| triBayes        | 15.50(1.48) | 4.10(2.28)  | 2.64(0.08)    | 0.00(0.00)  | 0.33(1.83)    | 0.02(0.13)    | 4.69(1.45)  |
| glineternet     | 16.20(1.16) | 7.17(3.94)  | 3.37(0.12)    | 0.00(0.00)  | 18.90(4.15)   | 0.89(0.12)    | 1.41(0.51)  |
| Lasso           | 10.83(1.98) | 1.13(0.63)  | 3.26(0.13)    | 0.00(0.00)  | 308.93(8.77)  | 1.15(0.08)    | 2.64(0.80)  |
| iFORM           | 14.33(3.20) | 42.87(6.41) | 3.96(0.19)    | 0.00(0.00)  | 39.83(4.28)   | 1.77(0.17)    | 2.92(1.52)  |
| HierNet         | -           | -           | -             | -           | -             | -             | -           |
| Grace           | 5.23(1.63)  | 0.13(0.43)  | 2.81(0.11)    | 4.77(1.25)  | 8.70(7.03)    | 1.49(0.04)    | 3.32(0.93)  |
| GEL             | 18.00(0.00) | 11.63(2.20) | 3.65(0.12)    | 13.20(0.55) | 132.40(21.54) | 2.11(0.29)    | 1.88(0.52)  |
| $p = 1400$      |             |             |               |             |               |               |             |
| proposed        | 17.03(3.26) | 2.20(1.83)  | 3.36(0.64)    | 16.13(3.08) | 10.03(5.33)   | 0.56(0.15)    | 0.70(0.21)  |
| triBayes        | 14.23(4.14) | 3.70(1.93)  | 2.44(0.66)    | 0.00(0.00)  | 0.00(0.00)    | 0.00(0.00)    | 4.37(1.58)  |
| glineternet     | 15.17(3.21) | 5.23(2.50)  | 3.25(0.62)    | 0.00(0.00)  | 16.77(4.43)   | 0.86(0.20)    | 1.48(0.52)  |
| Lasso           | 9.77(3.09)  | 1.10(0.80)  | 3.13(0.60)    | 0.00(0.00)  | 296.40(56.89) | 1.11(0.23)    | 2.69(0.86)  |
| iFORM           | 13.00(3.49) | 43.77(9.37) | 3.92(0.77)    | 0.00(0.00)  | 37.00(7.67)   | 1.71(0.37)    | 3.10(1.42)  |
| HierNet         | -           | -           | -             | -           | -             | -             | -           |
| Grace           | 5.30(2.22)  | 0.10(0.31)  | 2.62(0.72)    | 4.43(1.72)  | 8.97(9.22)    | 1.40(0.38)    | 3.13(1.15)  |
| GEL             | 16.80(4.57) | 11.20(4.02) | 3.44(0.94)    | 12.17(3.32) | 125.20(41.22) | 2.02(0.65)    | 1.94(0.79)  |



Table S15: Simulation results under the scenarios with  $p = 1000, \rho = 0.4, K = 100, r = 1/\sqrt{5}$ , coefficient type S1, and various sample sizes. In each cell, mean (SD) based on 100 replicates.

| <b>Approach</b> | <b>M:TP</b> | <b>M:FP</b> | <b>M:RSSE</b> | <b>I:TP</b> | <b>I:FP</b>   | <b>I:RSSE</b> | <b>PMSE</b> |
|-----------------|-------------|-------------|---------------|-------------|---------------|---------------|-------------|
| $n = 200$       |             |             |               |             |               |               |             |
| proposed        | 17.83(0.46) | 4.93(1.64)  | 0.54(0.08)    | 16.13(1.20) | 16.73(4.14)   | 0.75(0.12)    | 0.83(0.18)  |
| triBayes        | 15.43(1.10) | 8.73(3.33)  | 2.01(0.16)    | 0.27(1.46)  | 0.13(0.73)    | 1.59(0.05)    | 4.28(1.43)  |
| glineternet     | 10.87(3.67) | 2.27(2.12)  | 1.40(0.18)    | 6.13(3.50)  | 1.90(1.94)    | 1.41(0.12)    | 2.68(0.70)  |
| Lasso           | 7.97(1.77)  | 0.23(0.43)  | 1.53(0.12)    | 8.67(2.47)  | 193.17(9.06)  | 1.65(0.11)    | 3.07(0.88)  |
| iFORM           | 10.17(2.36) | 47.43(4.27) | 2.44(0.29)    | 3.50(1.63)  | 35.87(3.32)   | 2.02(0.19)    | 5.59(1.88)  |
| HierNet         | 8.20(2.28)  | 0.63(0.72)  | 1.50(0.12)    | 3.57(1.79)  | 4.70(3.15)    | 1.53(0.08)    | 3.09(0.63)  |
| Grace           | 8.83(1.90)  | 0.27(0.52)  | 1.51(0.12)    | 10.43(2.05) | 17.03(11.33)  | 1.29(0.14)    | 2.58(0.81)  |
| GEL             | 16.90(3.00) | 11.60(5.10) | 2.02(0.55)    | 11.17(2.12) | 116.10(39.24) | 4.86(1.77)    | 8.64(6.24)  |
| $n = 400$       |             |             |               |             |               |               |             |
| proposed        | 17.97(0.18) | 1.27(0.98)  | 0.26(0.07)    | 17.00(0.00) | 7.40(3.79)    | 0.33(0.07)    | 0.55(0.14)  |
| triBayes        | 17.67(0.55) | 12.60(2.69) | 1.02(0.08)    | 8.13(1.31)  | 4.20(1.27)    | 1.22(0.07)    | 2.02(0.72)  |
| glineternet     | 18.00(0.00) | 6.30(3.16)  | 0.71(0.10)    | 16.57(0.77) | 6.07(3.17)    | 0.78(0.10)    | 1.14(0.36)  |
| Lasso           | 15.33(2.34) | 0.00(0.00)  | 1.16(0.16)    | 15.33(1.35) | 27.47(11.18)  | 0.90(0.12)    | 1.62(0.57)  |
| iFORM           | 18.00(0.00) | 33.27(2.61) | 0.93(0.07)    | 16.90(0.31) | 28.43(2.54)   | 0.88(0.08)    | 1.17(0.25)  |
| HierNet         | 17.57(0.94) | 2.13(1.72)  | 0.88(0.18)    | 13.37(1.88) | 12.73(5.30)   | 1.15(0.15)    | 1.75(0.87)  |
| Grace           | 12.73(4.09) | 1.83(3.00)  | 1.20(0.36)    | 14.20(1.88) | 11.53(14.54)  | 1.12(0.15)    | 2.00(0.81)  |
| GEL             | 18.00(0.00) | 8.27(5.09)  | 0.54(0.09)    | 13.90(1.30) | 101.60(65.30) | 1.33(0.31)    | 1.11(0.30)  |
| $n = 500$       |             |             |               |             |               |               |             |
| proposed        | 18.00(0.00) | 0.43(0.73)  | 0.21(0.05)    | 17.00(0.00) | 4.30(2.18)    | 0.24(0.04)    | 0.52(0.13)  |
| triBayes        | 17.93(0.25) | 15.77(3.22) | 0.93(0.08)    | 8.90(1.03)  | 4.67(1.18)    | 1.17(0.05)    | 1.85(0.41)  |
| glineternet     | 18.00(0.00) | 5.13(3.05)  | 0.60(0.07)    | 17.00(0.00) | 5.00(2.60)    | 0.62(0.07)    | 0.92(0.27)  |
| Lasso           | 17.67(0.96) | 0.10(0.31)  | 0.86(0.12)    | 16.87(0.35) | 25.97(8.44)   | 0.64(0.11)    | 1.05(0.31)  |
| iFORM           | 18.00(0.00) | 33.10(2.81) | 0.83(0.06)    | 17.00(0.00) | 28.67(2.87)   | 0.74(0.05)    | 1.04(0.25)  |
| HierNet         | 17.97(0.18) | 2.00(1.82)  | 0.71(0.12)    | 14.93(1.23) | 10.43(4.15)   | 1.01(0.11)    | 1.36(0.36)  |
| Grace           | 16.83(2.74) | 4.40(3.24)  | 0.81(0.28)    | 16.37(1.50) | 27.13(16.19)  | 0.95(0.15)    | 1.18(0.53)  |
| GEL             | 18.00(0.00) | 5.90(5.29)  | 0.44(0.06)    | 14.23(1.68) | 78.33(72.50)  | 1.01(0.15)    | 0.95(0.18)  |

Table S16: Simulation results under the scenarios with  $p = 1000, \rho = 0.4, K = 100, r = 1/\sqrt{5}$ , coefficient type S2, and various sample sizes. In each cell, mean (SD) based on 100 replicates.

| <b>Approach</b> | <b>M:TP</b> | <b>M:FP</b> | <b>M:RSSE</b> | <b>I:TP</b> | <b>I:FP</b>   | <b>I:RSSE</b> | <b>PMSE</b> |
|-----------------|-------------|-------------|---------------|-------------|---------------|---------------|-------------|
| $n = 200$       |             |             |               |             |               |               |             |
| proposed        | 17.37(0.81) | 3.97(1.33)  | 0.57(0.11)    | 15.17(1.58) | 11.27(3.61)   | 0.84(0.16)    | 0.95(0.29)  |
| triBayes        | 15.13(1.50) | 4.80(2.51)  | 1.97(0.03)    | 0.00(0.00)  | 0.00(0.00)    | 1.66(0.00)    | 4.60(1.21)  |
| glinetnet       | 9.53(3.01)  | 1.47(1.55)  | 1.40(0.14)    | 5.70(2.96)  | 0.83(1.02)    | 1.48(0.11)    | 2.60(0.79)  |
| Lasso           | 6.07(1.76)  | 0.53(0.73)  | 1.55(0.09)    | 5.50(1.57)  | 205.40(7.39)  | 1.84(0.08)    | 3.53(1.17)  |
| iFORM           | 8.67(2.07)  | 50.50(3.33) | 2.60(0.30)    | 3.30(1.73)  | 34.30(3.49)   | 2.10(0.16)    | 5.27(1.41)  |
| HierNet         | 6.33(2.37)  | 0.53(0.78)  | 1.51(0.09)    | 3.43(1.98)  | 3.80(2.61)    | 1.59(0.08)    | 2.83(0.83)  |
| Grace           | 5.40(1.67)  | 0.37(0.56)  | 1.76(0.07)    | 4.03(1.65)  | 21.73(11.38)  | 1.55(0.07)    | 3.37(0.91)  |
| GEL             | 17.47(2.18) | 11.23(2.92) | 1.87(0.43)    | 11.53(1.94) | 118.03(30.49) | 4.66(1.21)    | 9.16(4.51)  |
| $n = 400$       |             |             |               |             |               |               |             |
| proposed        | 17.87(0.35) | 0.60(0.77)  | 0.28(0.09)    | 16.90(0.31) | 6.73(3.14)    | 0.37(0.11)    | 0.56(0.13)  |
| triBayes        | 17.03(1.75) | 8.43(3.73)  | 1.19(0.40)    | 5.70(3.51)  | 1.17(1.39)    | 1.40(0.16)    | 2.47(1.56)  |
| glinetnet       | 17.97(0.18) | 5.67(3.59)  | 0.76(0.08)    | 16.23(0.94) | 4.70(3.31)    | 0.84(0.12)    | 1.11(0.29)  |
| Lasso           | 12.47(3.96) | 0.27(0.52)  | 1.27(0.22)    | 12.93(2.57) | 96.87(156.68) | 1.18(0.16)    | 1.88(0.54)  |
| iFORM           | 17.97(0.18) | 34.17(2.28) | 0.96(0.08)    | 16.63(0.76) | 28.43(2.43)   | 0.90(0.12)    | 1.08(0.29)  |
| HierNet         | 17.17(1.26) | 2.60(2.01)  | 0.95(0.17)    | 13.33(1.52) | 12.60(5.98)   | 1.21(0.14)    | 1.42(0.41)  |
| Grace           | 5.30(1.39)  | 0.10(0.31)  | 1.75(0.06)    | 5.27(1.23)  | 1.63(1.59)    | 1.48(0.05)    | 3.51(1.10)  |
| GEL             | 17.83(0.91) | 11.07(3.46) | 0.55(0.13)    | 14.13(1.48) | 137.00(41.09) | 1.56(0.24)    | 1.22(0.37)  |
| $n = 500$       |             |             |               |             |               |               |             |
| proposed        | 17.97(0.18) | 0.30(0.65)  | 0.22(0.06)    | 16.97(0.18) | 6.17(3.85)    | 0.31(0.07)    | 0.55(0.13)  |
| triBayes        | 17.93(0.25) | 10.97(2.76) | 0.86(0.07)    | 8.57(0.90)  | 1.73(1.39)    | 1.27(0.05)    | 1.64(0.33)  |
| glinetnet       | 18.00(0.00) | 5.47(3.09)  | 0.64(0.10)    | 16.80(0.48) | 4.77(2.34)    | 0.68(0.09)    | 0.89(0.19)  |
| Lasso           | 17.10(1.49) | 0.20(0.41)  | 0.99(0.17)    | 16.03(1.16) | 26.43(10.47)  | 0.88(0.12)    | 1.29(0.20)  |
| iFORM           | 18.00(0.00) | 33.37(2.89) | 0.83(0.06)    | 17.00(0.00) | 28.30(2.91)   | 0.74(0.05)    | 0.95(0.18)  |
| HierNet         | 13.13(8.06) | 1.33(1.83)  | 0.58(0.38)    | 11.17(6.92) | 7.20(5.45)    | 0.79(0.49)    | 0.85(0.58)  |
| Grace           | 6.63(2.40)  | 0.13(0.43)  | 1.71(0.09)    | 5.67(1.21)  | 1.33(2.12)    | 1.45(0.07)    | 3.14(0.68)  |
| GEL             | 18.00(0.00) | 8.43(4.51)  | 0.44(0.08)    | 14.63(1.79) | 106.70(72.23) | 1.08(0.16)    | 0.94(0.22)  |

## S2.5 Additional data analysis results

Table S17: Analysis of the SKCM data using the proposed approach: identified main effects and interactions.

| Gene   | Main    | HK3     | HK2     | ADH5 | DLAT    | FBP1   | CS     | MDH2   | GUSB | GMPPA   | PMM1    | PFKFB4  | PMM2    | ACSL5   |
|--------|---------|---------|---------|------|---------|--------|--------|--------|------|---------|---------|---------|---------|---------|
| HK3    | -0.2589 |         |         |      |         |        |        |        |      |         |         |         |         | -0.3450 |
| HK2    | -0.1789 |         |         |      |         |        |        |        |      |         |         |         |         |         |
| ADH5   | -0.1107 |         |         |      |         |        |        |        |      |         |         |         |         |         |
| DLAT   | 0.0996  | 0.0527  |         |      |         |        |        |        |      |         |         |         |         | -0.0252 |
| FBP1   | 0.0180  |         |         |      | -0.1857 |        | 0.0848 | 0.2843 |      |         | -0.2398 | 0.1033  | -0.1339 | 0.0493  |
| PCK2   | -0.1593 |         |         |      |         |        | 0.1013 |        |      |         |         | -0.0556 |         | 0.0036  |
| CS     | 0.0713  |         |         |      |         |        |        |        |      |         |         |         |         | -0.0574 |
| MDH2   | -0.0767 | -0.4624 |         |      |         |        |        |        |      |         |         |         |         | 0.1532  |
| DLST   | 0.0715  |         |         |      |         | 0.0490 |        | 0.0500 |      |         | -0.0126 |         |         |         |
| GUSB   | 0.1671  | 0.2827  |         |      |         |        |        |        |      |         |         |         |         |         |
| GMPPA  | 0.1709  |         |         |      |         |        |        |        |      |         |         |         |         |         |
| PMM1   | 0.1908  | 0.2184  | -0.0410 |      |         |        |        |        |      | -0.0297 |         |         |         | 0.0970  |
| PFKFB4 | -0.0041 |         |         |      |         |        |        |        |      |         | 0.0364  | -0.0067 |         | 0.4628  |
| PMM2   | -0.2602 | 0.1326  |         |      |         |        |        |        |      |         |         | 0.2020  |         |         |
| GALE   | 0.0204  |         |         |      |         |        |        |        |      |         |         |         |         | -0.2027 |
| ACSL5  | 0.0919  |         |         |      |         |        |        |        |      | 0.0267  | 0.0943  |         |         |         |

Table S18: Analysis of the LUAD data using the proposed approach: identified main effects and interactions.

| Gene    | Main    | ACSS2   | ALDH2   | PGAM4   | PGM2    | PGAM1   | HK2     | AKR1A1  | LDHA    | PGK1    | ACLY    | CS     |
|---------|---------|---------|---------|---------|---------|---------|---------|---------|---------|---------|---------|--------|
| ACSS2   | 0.0423  |         |         |         |         |         |         |         |         |         |         |        |
| ALDH2   | 0.0617  | 0.0063  |         |         |         |         |         |         |         |         |         |        |
| PGAM4   | 0.0101  | -0.0604 | 0.0733  |         |         |         |         |         |         |         | 0.1912  |        |
| PGM2    | 0.0253  |         | 0.0527  |         |         |         |         |         |         |         |         |        |
| PGAM1   | -0.0153 | 0.1354  | 0.0680  |         |         |         |         |         |         |         |         |        |
| HK2     | -0.0268 | 0.0120  | 0.0320  | 0.2139  | -0.0817 | -0.1755 |         |         |         |         |         |        |
| AKR1A1  | -0.0009 |         | 0.0410  | -0.0440 |         | 0.0240  | 0.0408  |         |         |         |         |        |
| LDHA    | -0.0426 | -0.0978 | -0.0151 |         |         |         |         | 0.0249  |         |         | -0.1009 |        |
| PGK1    | 0.0100  |         | -0.0828 |         |         |         |         |         |         |         | -0.0766 |        |
| ALDH3A2 | -0.0216 |         |         | 0.0486  |         | -0.0730 | 0.0535  | -0.0620 | -0.0563 | -0.0366 | -0.0579 | 0.0512 |
| ACLY    | -0.0616 |         |         |         |         |         |         |         |         |         |         |        |
| CS      | -0.0096 |         | -0.0658 | -0.1090 |         |         | -0.0067 |         | -0.0333 | 0.1001  |         |        |
| DLST    | 0.0515  |         |         | -0.0376 |         | 0.0526  |         |         | -0.0481 |         |         |        |
